# Supplementary material for: Effects of hemoglobin extracted from Tegillarca granosa on the gut microbiota in iron deficiency anemia mice
Source: Royal Society of Chemistry journal article supplement (doi:10.1039/d3fo00695f), 2023-01-01
Supplement: d3fo00695f1.xlsx [file d3fo00695f1.xlsx]

## Sheet: Sheet1
Biomarker	Logarithm value	Groups	LDA_value	p-value
k__Bacteria.p__Zixibacteria.c__Zixibacteria	0.557255			-
k__Bacteria.p__Proteobacteria.c__Alphaproteobacteria.o__Rhizobiales.f__Devosiaceae	1.74433			-
k__Bacteria.p__Firmicutes.c__Clostridia.o__Clostridia_UCG_014.f__Clostridia_UCG_014	4.04269			0.000119034
k__Bacteria.p__Proteobacteria.c__Alphaproteobacteria.o__Rhizobiales	2.80021			-
k__Bacteria.p__Proteobacteria.c__Alphaproteobacteria.Other.Other	2.89105			0.00930096
k__Bacteria.p__Proteobacteria.c__Gammaproteobacteria.o__Burkholderiales.f__Methylophilaceae.g__MM2	1.12007			-
k__Bacteria.p__Actinobacteriota.c__Actinobacteria.o__Micrococcales.f__Cellulomonadaceae	0.557255			-
k__Bacteria.p__Acidobacteriota.c__Thermoanaerobaculia.o__Thermoanaerobaculales	1.20443			-
k__Bacteria.p__Bacteroidota.c__Bacteroidia.o__Chitinophagales.f__Chitinophagaceae.g__Edaphobaculum	0.506504			-
k__Bacteria.p__Campilobacterota.c__Campylobacteria	4.91918	Control	4.55202	0.00693383
k__Bacteria.p__Firmicutes.c__Clostridia.o__Peptococcales.f__Peptococcaceae	2.88053			0.000143753
k__Bacteria.p__Firmicutes.c__Bacilli.o__Erysipelotrichales.f__Erysipelotrichaceae.g__Turicibacter	2.14011			0.000289578
k__Bacteria.p__Firmicutes.c__Bacilli.Other.Other	1.95142			6.92e-05
k__Bacteria.p__Bacteroidota.c__Bacteroidia.o__Cytophagales.f__Microscillaceae	1.77145			-
k__Bacteria.p__Firmicutes.c__Bacilli.o__Erysipelotrichales.f__Erysipelatoclostridiaceae.Other	1.84861			0.000157946
k__Bacteria.p__Proteobacteria.c__Alphaproteobacteria.o__Rhizobiales.f__Devosiaceae.g__Devosia	1.74433			-
k__Bacteria.p__Campilobacterota.c__Campylobacteria.o__Campylobacterales.f__Arcobacteraceae	0.679179			0.047163
k__Bacteria.p__Firmicutes.c__Clostridia.o__Peptostreptococcales_Tissierellales.f__Peptostreptococcaceae.g__Romboutsia	2.66687			0.0025874
k__Bacteria.p__Patescibacteria.c__Parcubacteria	0.485479			-
k__Bacteria.p__Proteobacteria.c__Gammaproteobacteria.o__Xanthomonadales.f__Rhodanobacteraceae.Other	0.762482			-
k__Bacteria.p__Elusimicrobiota	0.779586			-
k__Bacteria.p__Proteobacteria.c__Gammaproteobacteria.o__Xanthomonadales.f__Xanthomonadaceae.g__Stenotrophomonas	0.862495			-
k__Bacteria.p__Bacteroidota.c__Bacteroidia.Other.Other.Other	1.83683			0.000106131
k__Bacteria.p__Actinobacteriota.c__Thermoleophilia.o__Gaiellales.Other	1.30151			-
k__Bacteria.p__Proteobacteria.c__Alphaproteobacteria.o__Caulobacterales.f__Hyphomonadaceae.g__SWB02	1.48652			-
k__Bacteria.p__Proteobacteria.c__Gammaproteobacteria.o__Burkholderiales.f__Gallionellaceae.g__Sideroxydans	0.652196			-
k__Bacteria.p__Firmicutes.c__Clostridia.o__Oscillospirales.f__Ruminococcaceae.g___Eubacterium__siraeum_group	2.79884			1.45e-06
k__Bacteria.p__Actinobacteriota.c__Actinobacteria.o__Micromonosporales.f__Micromonosporaceae	2.3143			0.000986475
k__Bacteria.p__Bacteroidota.c__Bacteroidia	5.8048			-
k__Bacteria.p__Firmicutes.c__Bacilli.o__Erysipelotrichales.f__Erysipelatoclostridiaceae.g__Coprobacillus	0.474677			-
k__Bacteria.p__Desulfobacterota.c__Desulfovibrionia	4.55075	Lowdose	4.10216	0.0405721
k__Bacteria.p__Proteobacteria.c__Gammaproteobacteria.o__Ectothiorhodospirales.f__Thioalkalispiraceae	1.43668			0.000382307
k__Bacteria.p__Firmicutes.c__Bacilli.o__Mycoplasmatales.f__Mycoplasmataceae.g__Mycoplasma	2.53829			-
k__Bacteria.p__Firmicutes.c__Bacilli.o__Erysipelotrichales.Other.Other	2.94998			3.17e-05
k__Bacteria.p__Proteobacteria.c__Alphaproteobacteria.o__Rickettsiales.f__Rickettsiaceae.g__Candidatus_Megaira	1.24561			0.000496718
k__Bacteria.p__Acidobacteriota.c__Subgroup_5.o__Subgroup_5	1.41035			-
k__Bacteria.p__Firmicutes.c__Bacilli.o__Lactobacillales.f__Streptococcaceae	1.92543			-
k__Bacteria.p__Desulfobacterota.c__Desulfobaccia.o__Desulfobaccales.f__Desulfobaccaceae.g__Desulfobacca	1.43141			-
k__Bacteria.p__Myxococcota.c__Polyangia.o__Blfdi19.f__Blfdi19.g__Blfdi19	0.506198			-
k__Bacteria.p__Proteobacteria.c__Gammaproteobacteria.o__Burkholderiales.f__Comamonadaceae.g__Malikia	2.06734			0.0047885
k__Bacteria.p__Proteobacteria.c__Gammaproteobacteria.o__Burkholderiales.Other.Other	2.26485			0.000431579
k__Bacteria.p__Bacteroidota.c__Bacteroidia.o__Bacteroidales	5.80441			-
k__Bacteria.p__Actinobacteriota.c__Acidimicrobiia.o__Microtrichales.f__Ilumatobacteraceae.g__Ilumatobacter	0.81734			-
k__Bacteria.p__Firmicutes.c__Clostridia.o__Oscillospirales.f__Ruminococcaceae.g__Negativibacillus	3.464			0.000253161
k__Bacteria.p__Bacteroidota.c__Bacteroidia.o__Bacteroidales.f__Rikenellaceae	4.82726			-
k__Bacteria.p__Actinobacteriota.c__Actinobacteria.o__Frankiales.f__Nakamurellaceae.g__Nakamurella	0.496688			-
k__Bacteria.p__Firmicutes.c__Bacilli.o__Lactobacillales.f__Lactobacillaceae.g__Lactobacillus	4.24511			0.018723
k__Bacteria.p__Proteobacteria.c__Alphaproteobacteria.o__Rhodospirillales.f__Magnetospiraceae.g__uncultured	0.742445			-
k__Bacteria.p__Firmicutes.c__Clostridia.o__Lachnospirales.f__Lachnospiraceae.g__Acetatifactor	3.07487			0.00871897
k__Bacteria.p__Bacteroidota.c__Bacteroidia.o__Bacteroidales.f__Muribaculaceae.g__Muribaculum	3.57607			9.71e-05
k__Bacteria.p__NB1_j.c__NB1_j	1.04423			-
k__Bacteria.p__Actinobacteriota.c__Actinobacteria.o__Pseudonocardiales.f__Pseudonocardiaceae	1.75807			-
k__Bacteria.p__Patescibacteria.c__Saccharimonadia.o__Saccharimonadales.f__S32.g__TM7	0.212961			-
k__Bacteria.p__Firmicutes.c__Clostridia.o__Oscillospirales.f__Oscillospirales.g__Hydrogenoanaerobacterium	1.10602			-
k__Bacteria.p__Actinobacteriota.c__Actinobacteria.o__Micromonosporales	2.3143			0.000986475
k__Bacteria.p__Actinobacteriota.c__Thermoleophilia.o__Gaiellales.Other.Other	1.30151			-
k__Bacteria.p__Chloroflexi.c__Anaerolineae.o__Anaerolineae.f__Anaerolineae.g__Anaerolineae	1.45837			-
k__Bacteria.p__Proteobacteria.c__Alphaproteobacteria.o__Micropepsales.f__Micropepsaceae.g__uncultured	2.15626			-
k__Bacteria.p__Proteobacteria.c__Gammaproteobacteria.o__Burkholderiales.Other	2.26485			0.000431579
k__Bacteria.p__Actinobacteriota.c__Actinobacteria.o__Pseudonocardiales.f__Pseudonocardiaceae.g__Amycolatopsis	1.11074			-
k__Bacteria.p__Proteobacteria.c__Alphaproteobacteria.o__Caedibacterales.f__Caedibacteraceae.g__Caedibacter	0.512797			-
k__Bacteria.p__Verrucomicrobiota.c__Verrucomicrobiae.o__Pedosphaerales.f__Pedosphaeraceae	1.59281			0.0181011
k__Bacteria.p__Nitrospirota.c__Nitrospiria.o__Nitrospirales.f__Nitrospiraceae	2.13353			-
k__Bacteria.p__Verrucomicrobiota.c__Verrucomicrobiae.o__Verrucomicrobiales.f__Akkermansiaceae	2.05999			-
k__Bacteria.p__Proteobacteria.c__Alphaproteobacteria.o__Sphingomonadales.f__Sphingomonadaceae.g__Sphingorhabdus	1.34899			0.000160657
k__Bacteria.p__Proteobacteria.c__Gammaproteobacteria.o__Steroidobacterales.f__Steroidobacteraceae.g__uncultured	1.25858			-
k__Bacteria.Other	3.54351			0.010607
k__Bacteria.p__Firmicutes.c__Clostridia.o__Clostridia_UCG_014.f__Clostridia_UCG_014.g__Clostridia_UCG_014	4.04269			0.000119034
k__Bacteria.p__Proteobacteria.c__Alphaproteobacteria.o__Rhodobacterales.f__Rhodobacteraceae	1.87324			7.41e-05
k__Bacteria.p__Proteobacteria.c__Gammaproteobacteria.o__Enterobacterales.f__Morganellaceae	3.9049			0.000323727
k__Bacteria.p__SAR324_clade_Marine_group_B_.c__SAR324_clade_Marine_group_B_.o__SAR324_clade_Marine_group_B_.f__SAR324_clade_Marine_group_B_.g__SAR324_clade_Marine_group_B_	0.644869			-
k__Bacteria.p__Proteobacteria.c__Alphaproteobacteria.o__Rhizobiales.f__Hyphomicrobiaceae.g__Pedomicrobium	1.02436			-
k__Bacteria.p__Firmicutes.c__Clostridia.o__Christensenellales.f__Christensenellaceae.g__Christensenella	2.31672			1.83e-06
k__Bacteria.p__Firmicutes.c__Clostridia.o__Oscillospirales.f___Eubacterium__coprostanoligenes_group.g___Eubacterium__coprostanoligenes_group	2.77143			-
k__Bacteria.p__Acidobacteriota.c__Holophagae.o__Subgroup_7.f__Subgroup_7	1.72494			0.0232462
k__Bacteria.p__Firmicutes.c__Bacilli.o__RF39	2.82362			0.000276861
k__Bacteria.p__Patescibacteria.c__Saccharimonadia.o__Saccharimonadales.f__Saccharimonadales.g__Saccharimonadales	1.00917			-
k__Bacteria.p__Nitrospirota.c__4_29_1.o__4_29_1	1.98409			0.000691294
k__Bacteria.p__Proteobacteria.c__Alphaproteobacteria.o__Rhizobiales.f__Hyphomicrobiaceae	1.3237			-
k__Bacteria.p__Verrucomicrobiota	2.11126			-
k__Bacteria.p__Firmicutes.c__Bacilli.o__Lactobacillales.f__Lactobacillaceae	4.24511			0.018723
k__Bacteria.p__Myxococcota.c__Myxococcia.o__Myxococcales.f__Myxococcaceae.g__P3OB_42	1.38674			0.0401049
k__Bacteria.p__Proteobacteria.c__Alphaproteobacteria.o__Paracaedibacterales.f__Paracaedibacteraceae	0.90647			0.0337079
k__Bacteria.p__Actinobacteriota.c__Actinobacteria.o__Frankiales.f__Sporichthyaceae	2.03733			0.000655701
k__Bacteria.p__Actinobacteriota.c__Actinobacteria.o__Frankiales.f__Acidothermaceae	1.59654			0.0337335
k__Bacteria.p__Firmicutes.c__Bacilli.o__Staphylococcales.f__Gemellaceae.g__Gemella	1.20466			-
k__Bacteria.p__Desulfobacterota.c__uncultured.o__uncultured	1.54204			-
k__Bacteria.p__Proteobacteria	5.06106	Model	4.72397	0.000157003
k__Bacteria.p__Firmicutes.c__Clostridia.o__Peptococcales.f__Peptococcaceae.g__Peptococcus	2.86155			0.000529316
k__Bacteria.p__Bacteroidota.c__Bacteroidia.o__Chitinophagales.f__Chitinophagaceae.g__uncultured	1.95706			-
k__Bacteria.p__Firmicutes.c__Bacilli.o__Erysipelotrichales.f__Erysipelotrichaceae.Other	3.39346			7.63e-05
k__Bacteria.p__Actinobacteriota.c__Actinobacteria.o__Pseudonocardiales.f__Pseudonocardiaceae.g__Lechevalieria	1.00505			-
k__Bacteria.p__Proteobacteria.c__Alphaproteobacteria.o__Rhodospirillales.Other.Other	0.955189			0.0197932
k__Bacteria.p__Proteobacteria.c__Gammaproteobacteria.o__Burkholderiales.f__Methylophilaceae.g__Methylophilaceae	0.212961			-
k__Bacteria.p__Firmicutes.c__Clostridia.o__uncultured	1.11297			-
k__Bacteria.p__Actinobacteriota.c__Actinobacteria.o__Frankiales.f__Geodermatophilaceae	1.32742			-
k__Bacteria.p__Firmicutes.c__Clostridia.o__Clostridiales.f__Clostridiaceae.g__Candidatus_Arthromitus	1.53657			0.0320237
k__Bacteria.p__Proteobacteria.c__Alphaproteobacteria.o__Rhizobiales.f__Xanthobacteraceae	2.61218			0.0294202
k__Bacteria.p__Actinobacteriota.c__Actinobacteria.o__PeM15.f__PeM15.g__PeM15	1.41555			6.42e-05
k__Bacteria.p__Bacteroidota.c__Bacteroidia.o__Chitinophagales.f__Chitinophagaceae.g__Segetibacter	1.02547			-
k__Bacteria.p__Acidobacteriota.c__Holophagae.o__Holophagales.f__Holophagaceae.g__Holophaga	0.914268			-
k__Bacteria.p__Latescibacterota.c__Latescibacterota.o__Latescibacterota	0.779982			-
k__Bacteria.p__Firmicutes.c__Bacilli.o__Erysipelotrichales.f__Erysipelatoclostridiaceae	4.42849	Model	4.10152	2.93e-06
k__Bacteria.p__Proteobacteria.c__Gammaproteobacteria.o__Burkholderiales.f__Alcaligenaceae	1.32233			-
k__Bacteria.p__Elusimicrobiota.c__Lineage_IIa	0.779586			0.0462361
k__Bacteria.p__Acidobacteriota.c__Acidobacteriae.o__Solibacterales	2.35347			0.0206898
k__Bacteria.p__Proteobacteria.c__Alphaproteobacteria.o__Rhizobiales.f__Methyloligellaceae.g__Methyloligellaceae	0.952663			-
k__Bacteria.p__Acidobacteriota.c__Acidobacteriae.Other.Other	0.866573			-
k__Bacteria.p__Proteobacteria.c__Gammaproteobacteria.o__Pasteurellales	0.915952			-
k__Bacteria.p__Proteobacteria.c__Gammaproteobacteria.o__Xanthomonadales.f__Xanthomonadaceae.Other	0.672372			-
k__Bacteria.p__Proteobacteria.c__Alphaproteobacteria.o__SAR11_clade.f__Clade_III	2.1832			0.000778439
k__Bacteria.p__Acidobacteriota.c__Acidobacteriae.o__Acidobacteriales.f__Acidobacteriaceae__Subgroup_1_.Other	2.04901			-
k__Bacteria.p__Firmicutes.c__Clostridia.o__Christensenellales	2.82985			0.00041749
k__Bacteria.p__Chloroflexi.c__Anaerolineae	1.65768			-
k__Bacteria.p__Bacteroidota.c__Bacteroidia.o__Cytophagales.f__Spirosomaceae.g__Pseudarcicella	0.809026			0.011463
k__Bacteria.p__Proteobacteria.c__Gammaproteobacteria.o__Steroidobacterales.f__Steroidobacteraceae	1.41732			-
k__Bacteria.p__Acidobacteriota.c__Acidobacteriae.o__Bryobacterales	2.29253			0.0138781
k__Bacteria.p__Bacteroidota.c__Bacteroidia.o__Chitinophagales.f__Chitinophagaceae.Other	1.00613			-
k__Bacteria.p__Acidobacteriota.c__Subgroup_22	1.0823			-
k__Bacteria.p__Firmicutes.c__Bacilli.o__Bacillales.f__Bacillaceae.g__Bacillus	1.63157			0.0370508
k__Bacteria.p__Proteobacteria.c__Gammaproteobacteria.o__Legionellales.f__Legionellaceae	0.819042			-
k__Bacteria.p__Bacteroidota.c__Bacteroidia.o__Chitinophagales.f__Saprospiraceae.Other	0.819042			-
k__Bacteria.p__Firmicutes.c__Clostridia.o__Lachnospirales.f__Lachnospiraceae.g___Acetivibrio__ethanolgignens_group	3.46419			0.00065504
k__Bacteria.p__Bacteroidota.c__Bacteroidia.o__Bacteroidales.f__Prevotellaceae.Other	2.9658			3.57e-06
k__Bacteria.p__Proteobacteria.c__Gammaproteobacteria.o__Burkholderiales.f__Burkholderiaceae	2.27387			0.000249497
k__Bacteria.p__Proteobacteria.c__Alphaproteobacteria.o__Rhizobiales.f__Beijerinckiaceae	1.24921			-
k__Bacteria.p__Desulfobacterota.c__Desulfuromonadia.o__Geobacterales	1.96525			0.0391912
k__Bacteria.p__Gemmatimonadota.c__Gemmatimonadetes.o__Gemmatimonadales.f__Gemmatimonadaceae.Other	1.20812			-
k__Bacteria.p__Firmicutes.c__Clostridia.o__Oscillospirales.f___Clostridium__methylpentosum_group	2.64629			9.44e-05
k__Bacteria.p__Desulfobacterota.c__Desulfobacteria.o__Desulfobacterales.f__Desulfosarcinaceae	1.03567			-
k__Bacteria.p__Fusobacteriota.c__Fusobacteriia.o__Fusobacteriales	2.02989			-
k__Bacteria.p__Proteobacteria.c__Alphaproteobacteria.o__Rhizobiales.f__C2U	0.819042			-
k__Bacteria.p__Nitrospirota.c__Nitrospiria.o__Nitrospirales	2.13353			-
k__Bacteria.p__Actinobacteriota.c__Actinobacteria.o__Corynebacteriales.f__Mycobacteriaceae	1.94301			-
k__Bacteria.p__Proteobacteria.c__Alphaproteobacteria.o__Sphingomonadales	3.01435			-
k__Bacteria.p__Actinobacteriota.c__Actinobacteria.o__Kineosporiales.f__Kineosporiaceae.Other	1.2868			0.036313
k__Bacteria.p__Proteobacteria.c__Gammaproteobacteria.o__Xanthomonadales.f__Xanthomonadaceae.g__Pseudoxanthomonas	0.519763			-
k__Bacteria.p__Actinobacteriota.c__Actinobacteria.o__Streptosporangiales.f__Streptosporangiaceae.g__Streptosporangium	0.198055			-
k__Bacteria.p__Patescibacteria.c__Parcubacteria.o__Parcubacteria.f__Parcubacteria	0.485479			-
k__Bacteria.p__Proteobacteria.c__Gammaproteobacteria.o__Xanthomonadales.f__Rhodanobacteraceae.g__Dokdonella	1.24069			-
k__Bacteria.p__Desulfobacterota.c__Desulfobaccia	1.43141			-
k__Bacteria.p__Firmicutes.c__Bacilli.o__Staphylococcales.f__Gemellaceae	1.20466			-
k__Bacteria.p__Firmicutes.c__Clostridia.o__Lachnospirales.f__Lachnospiraceae.g__Lachnospiraceae_NC2004_group	1.12265			-
k__Bacteria.p__Acidobacteriota.c__Subgroup_5.o__Subgroup_5.f__Subgroup_5.g__Subgroup_5	1.41035			-
k__Bacteria.p__Actinobacteriota.c__Actinobacteria.o__Micrococcales.f__Intrasporangiaceae.g__Oryzihumus	1.50845			-
k__Bacteria.p__Bacteroidota.c__Bacteroidia.o__Bacteroidales.f__Marinifilaceae	4.48175	Control	4.03053	0.00862925
k__Bacteria.p__Gemmatimonadota.c__Longimicrobia.o__Longimicrobiales.f__Longimicrobiaceae.g__YC_ZSS_LKJ147	0.807872			-
k__Bacteria.p__Bacteroidota.c__Bacteroidia.o__Chitinophagales.f__Chitinophagaceae.g__Niastella	0.761941			-
k__Bacteria.p__Proteobacteria.c__Alphaproteobacteria.o__Defluviicoccales.f__uncultured	0.547207			-
k__Bacteria.p__Patescibacteria.c__Saccharimonadia.o__Saccharimonadales.f__Saccharimonadales	1.00917			-
k__Bacteria.p__Desulfobacterota.c__uncultured	1.54204			-
k__Bacteria.p__Actinobacteriota.c__Coriobacteriia.o__Coriobacteriales.f__Eggerthellaceae.g__uncultured	1.32602			0.0212027
k__Bacteria.p__Desulfobacterota.c__Syntrophorhabdia	1.4326			-
k__Bacteria.p__NB1_j.c__NB1_j.o__NB1_j.f__NB1_j	1.04423			-
k__Bacteria.p__Bacteroidota.c__Bacteroidia.o__Bacteroidales.f__Prevotellaceae	4.42007	Control	4.11469	4.7e-05
k__Bacteria.p__Desulfobacterota.c__Syntrophobacteria.o__Syntrophobacterales.f__uncultured.g__uncultured	0.275488			-
k__Bacteria.p__Bacteroidota.c__Bacteroidia.o__Bacteroidales.f__Bacteroidaceae	5.39889	Model	5.03988	1.17e-06
k__Bacteria.p__Campilobacterota.c__Campylobacteria.o__Campylobacterales.f__Helicobacteraceae	4.91918	Control	4.55202	0.00693383
k__Bacteria.p__Firmicutes.c__Bacilli.o__RF39.f__RF39.g__RF39	2.82362			0.000276861
k__Bacteria.p__Chloroflexi.c__Anaerolineae.o__SJA_15.f__SJA_15.g__SJA_15	1.29251			-
k__Bacteria.p__Firmicutes.c__Clostridia.o__Oscillospirales.f__Oscillospiraceae.g__Colidextribacter	4.33926			0.00124023
k__Bacteria.p__Chloroflexi.c__Dehalococcoidia.Other.Other.Other	0.446275			-
k__Bacteria.p__Nitrospirota	2.49709			0.000526501
k__Bacteria.Other.Other.Other.Other.Other	3.54351			0.010607
k__Bacteria.p__Proteobacteria.c__Alphaproteobacteria.o__Rhodospirillales.Other	0.955189			0.0197932
k__Bacteria.p__Actinobacteriota.c__Acidimicrobiia.o__Microtrichales.f__Ilumatobacteraceae	2.48429			0.000638901
k__Bacteria.p__Myxococcota.c__Myxococcia	1.41462			-
k__Bacteria.p__Proteobacteria.c__Alphaproteobacteria.o__Defluviicoccales.f__uncultured.g__uncultured	0.547207			-
k__Bacteria.p__Gemmatimonadota.c__AKAU4049.o__AKAU4049	1.17122			-
k__Bacteria.p__Actinobacteriota.c__Coriobacteriia.o__Coriobacteriales.f__Atopobiaceae	3.24577			0.0248014
k__Bacteria.p__Bacteroidota.c__Bacteroidia.o__Bacteroidales.Other	4.26848			0.000556915
k__Bacteria.p__Fusobacteriota.c__Fusobacteriia.o__Fusobacteriales.f__Fusobacteriaceae	2.02989			-
k__Bacteria.p__Bacteroidota.c__Bacteroidia.o__Bacteroidales.f__Dysgonomonadaceae	1.21571			-
k__Bacteria.p__Acidobacteriota.c__Thermoanaerobaculia.o__Thermoanaerobaculales.f__Thermoanaerobaculaceae	1.20443			-
k__Bacteria	6			-
k__Bacteria.p__Bacteroidota.c__Bacteroidia.o__Chitinophagales.f__Chitinophagaceae.g__Terrimonas	1.33529			-
k__Bacteria.p__Proteobacteria.c__Alphaproteobacteria.o__uncultured.f__uncultured	2.06614			-
k__Bacteria.p__Proteobacteria.c__Alphaproteobacteria.o__Elsterales.f__URHD0088	1.23571			0.049202
k__Bacteria.p__Proteobacteria.c__Gammaproteobacteria.o__KF_JG30_C25.f__KF_JG30_C25	1.0106			-
k__Bacteria.p__Proteobacteria.c__Alphaproteobacteria.o__Rhizobiales.f__Xanthobacteraceae.g__uncultured	2.23543			-
k__Bacteria.p__Proteobacteria.c__Gammaproteobacteria.o__JG36_TzT_191.f__JG36_TzT_191.g__JG36_TzT_191	0.567938			-
k__Bacteria.p__Proteobacteria.c__Alphaproteobacteria.o__Rhodobacterales.f__Rhodobacteraceae.g__Rhodobacter	0.512797			-
k__Bacteria.p__SAR324_clade_Marine_group_B_.c__SAR324_clade_Marine_group_B_.o__SAR324_clade_Marine_group_B_.f__SAR324_clade_Marine_group_B_	0.644869			-
k__Bacteria.p__Proteobacteria.c__Gammaproteobacteria.o__Ectothiorhodospirales.f__Thioalkalispiraceae.g__Thioalkalispira_Sulfurivermis	1.43668			0.000382307
k__Bacteria.p__Proteobacteria.c__Alphaproteobacteria.o__Rhizobiales.f__Methylopilaceae	0.850147			-
k__Bacteria.p__Proteobacteria.c__Gammaproteobacteria.o__Legionellales	0.819042			-
k__Bacteria.p__RCP2_54.c__RCP2_54	1.9273			-
k__Bacteria.p__Myxococcota.c__Polyangia.o__Polyangiales.f__BIrii41	1.41003			-
k__Bacteria.p__Firmicutes.c__Clostridia.o__uncultured.f__uncultured	1.11297			-
k__Bacteria.p__Gemmatimonadota.c__BD2_11_terrestrial_group	0.660155			-
k__Bacteria.p__Bacteroidota.c__Bacteroidia.o__Chitinophagales.f__Chitinophagaceae	2.35481			-
k__Bacteria.p__Actinobacteriota.c__Actinobacteria.o__Streptomycetales.f__Streptomycetaceae.g__Streptomyces	2.49593			0.00262884
k__Bacteria.p__Actinobacteriota.c__Actinobacteria.o__Kineosporiales.f__Kineosporiaceae	1.2868			0.036313
k__Bacteria.p__Firmicutes.c__Clostridia.o__Oscillospirales.f__Oscillospiraceae.Other	4.24044			6.74e-06
k__Bacteria.p__Desulfobacterota.c__Desulfuromonadia.o__Geobacterales.f__Geobacteraceae.g__Citrifermentans	1.48903			-
k__Bacteria.p__Gemmatimonadota.c__Gemmatimonadetes.o__Gemmatimonadales.f__Gemmatimonadaceae.g__uncultured	2.48546			-
k__Bacteria.p__Chloroflexi.c__Anaerolineae.o__SJA_15.f__SJA_15	1.29251			-
k__Bacteria.p__Proteobacteria.c__Gammaproteobacteria.o__Burkholderiales.f__Rhodocyclaceae	1.58651			-
k__Bacteria.p__Bacteroidota.c__Bacteroidia.o__Cytophagales.f__Cyclobacteriaceae.g__Algoriphagus	1.29616			-
k__Bacteria.p__Patescibacteria.c__Saccharimonadia.o__Saccharimonadales	1.55909			0.022431
k__Bacteria.p__Bacteroidota.c__Bacteroidia.o__Cytophagales.f__Spirosomaceae	1.25242			0.0033177
k__Bacteria.p__Acidobacteriota.c__Subgroup_5	1.41035			-
k__Bacteria.p__Sva0485.c__Sva0485.o__Sva0485.f__Sva0485.g__Sva0485	1.60107			0.0198493
k__Bacteria.p__Fibrobacterota.c__Fibrobacteria.o__Fibrobacterales.f__Fibrobacteraceae	0.213837			-
k__Bacteria.p__Proteobacteria.c__Gammaproteobacteria.o__KI89A_clade.f__KI89A_clade.g__KI89A_clade	0.678098			-
k__Bacteria.p__Actinobacteriota.c__Actinobacteria.o__Frankiales.f__Sporichthyaceae.g__uncultured	0.91122			-
k__Bacteria.p__Chloroflexi.c__Dehalococcoidia.Other.Other	0.446275			-
k__Bacteria.p__Actinobacteriota.c__Acidimicrobiia.Other.Other.Other	0.958959			-
k__Bacteria.p__Proteobacteria.c__Alphaproteobacteria.o__Rhizobiales.f__Rhizobiaceae.g__Aminobacter	0.518012			-
k__Bacteria.p__Patescibacteria.c__Parcubacteria.o__Candidatus_Jorgensenbacteria.f__Candidatus_Jorgensenbacteria.g__Candidatus_Jorgensenbacteria	0.449344			-
k__Bacteria.p__Myxococcota.c__Polyangia.o__Polyangiales.f__Sandaracinaceae	1.05326			-
k__Bacteria.p__Firmicutes.c__Clostridia.o__Clostridiales.f__Clostridiaceae	2.93745			0.0281957
k__Bacteria.p__Firmicutes.c__Bacilli.o__Exiguobacterales	0.741777			-
k__Bacteria.p__Proteobacteria.c__Gammaproteobacteria.o__Burkholderiales.f__Nitrosomonadaceae.g__Ellin6067	2.18577			-
k__Bacteria.p__Nitrospirota.c__Thermodesulfovibrionia.o__uncultured.f__uncultured	1.96195			-
k__Bacteria.p__Proteobacteria.c__Gammaproteobacteria.o__Burkholderiales.f__Methylophilaceae.g__uncultured	1.11447			0.0150043
k__Bacteria.p__Actinobacteriota.c__Actinobacteria.o__PeM15.f__PeM15	1.41555			6.42e-05
k__Bacteria.p__Firmicutes.c__Bacilli.o__Mycoplasmatales.f__Mycoplasmataceae	2.53829			-
k__Bacteria.p__Firmicutes.c__Clostridia.o__Oscillospirales.f__Butyricicoccaceae.g__UCG_009	2.90006			0.000118338
k__Bacteria.p__Firmicutes.c__Clostridia.o__Oscillospirales.f__Oscillospiraceae.g__Flavonifractor	3.35921			1.39e-05
k__Bacteria.p__Firmicutes.c__Clostridia.o__Christensenellales.f__Christensenellaceae.g__uncultured	2.30957			-
k__Bacteria.p__Firmicutes.c__Clostridia.o__Lachnospirales.f__Lachnospiraceae.g__ASF356	3.34064			3.85e-05
k__Bacteria.p__Verrucomicrobiota.c__Chlamydiae.o__Chlamydiales	0.506173			-
k__Bacteria.p__Bacteroidota.c__Bacteroidia.o__Bacteroidales.f__Rikenellaceae.g__Rikenellaceae_RC9_gut_group	4.47591			-
k__Bacteria.p__Actinobacteriota.c__Acidimicrobiia.o__Microtrichales.f__uncultured.g__uncultured	1.73498			-
k__Bacteria.p__Myxococcota.c__Myxococcia.o__Myxococcales.f__Myxococcaceae.g__uncultured	0.253939			-
k__Bacteria.p__Firmicutes.c__Clostridia.o__Lachnospirales.f__Lachnospiraceae.g__Marvinbryantia	2.78572			0.0357323
k__Bacteria.p__Actinobacteriota.c__Coriobacteriia.o__Coriobacteriales.f__Atopobiaceae.g__Coriobacteriaceae_UCG_002	3.24089			0.0120144
k__Bacteria.p__Firmicutes.c__Bacilli.o__Staphylococcales.f__Staphylococcaceae.g__Staphylococcus	1.75691			-
k__Bacteria.p__Proteobacteria.c__Alphaproteobacteria.o__Rhizobiales.f__uncultured.g__uncultured	1.19554			-
k__Bacteria.p__Bacteroidota.c__SJA_28.o__SJA_28.f__SJA_28.g__SJA_28	1.59907			0.0342574
k__Bacteria.p__Proteobacteria.c__Gammaproteobacteria.o__Burkholderiales.f__Comamonadaceae.g__Rubrivivax	1.36061			0.00061856
k__Bacteria.p__Proteobacteria.c__Gammaproteobacteria.o__R7C24	1.25502			0.0212546
k__Bacteria.p__Proteobacteria.c__Gammaproteobacteria.o__KI89A_clade.f__KI89A_clade	0.678098			-
k__Bacteria.p__Myxococcota.c__bacteriap25.o__bacteriap25	1.10525			-
k__Bacteria.p__Acidobacteriota.c__Acidobacteriae.o__Acidobacteriales.f__Koribacteraceae	2.0844			-
k__Bacteria.p__Latescibacterota.c__Latescibacterota.o__Latescibacterota.f__Latescibacterota	0.779982			-
k__Bacteria.p__Acidobacteriota.c__Acidobacteriae.o__PAUC26f	1.05525			-
k__Bacteria.p__Actinobacteriota.c__Thermoleophilia.o__Solirubrobacterales.f__Solirubrobacteraceae.g__uncultured	0.951358			-
k__Bacteria.p__Firmicutes.c__Clostridia.o__Oscillospirales.f__Ruminococcaceae	4.26891			0.0166654
k__Bacteria.p__Actinobacteriota.c__Actinobacteria.o__Bifidobacteriales.f__Bifidobacteriaceae.g__Bifidobacterium	4.38901	FeSO4	4.12353	0.000177673
k__Bacteria.p__Firmicutes.c__Clostridia.o__Oscillospirales.f__Ruminococcaceae.g__Anaerotruncus	3.68667			0.00429428
k__Bacteria.p__Firmicutes.c__Clostridia.o__Peptostreptococcales_Tissierellales.f__Anaerovoracaceae.g___Eubacterium__brachy_group	2.27281			0.0254332
k__Bacteria.p__Firmicutes.c__Clostridia.o__Oscillospirales.f__Oscillospiraceae.g__uncultured	4.57991	Lowdose	4.17401	4.99e-05
k__Bacteria.p__Firmicutes.c__Clostridia.o__Lachnospirales.f__Lachnospiraceae.g__Blautia	4.87417	Model	4.55773	2.4e-06
k__Bacteria.p__Bacteroidota.c__Bacteroidia.o__Bacteroidales.f__Marinifilaceae.Other	0.676573			-
k__Bacteria.p__Desulfobacterota.c__Desulfovibrionia.o__Desulfovibrionales	4.55075	Lowdose	4.10216	0.0405721
k__Bacteria.p__Firmicutes.c__Clostridia.o__Oscillospirales.f__uncultured	1.36755			0.000301986
k__Bacteria.p__Bacteroidota.c__Kryptonia.o__Kryptoniales	1.57623			0.0203872
k__Bacteria.p__Desulfobacterota.c__Syntrophobacteria.o__Syntrophobacterales.f__uncultured	0.275488			-
k__Bacteria.p__Actinobacteriota.c__Actinobacteria.o__Micromonosporales.f__Micromonosporaceae.Other	1.91745			0.0152294
k__Bacteria.p__Firmicutes.c__Clostridia.o__Oscillospirales.f___Eubacterium__coprostanoligenes_group	2.77143			-
k__Bacteria.p__Proteobacteria.Other.Other.Other	2.47269			2.63e-05
k__Bacteria.p__Proteobacteria.c__Gammaproteobacteria.o__Xanthomonadales.f__Xanthomonadaceae.g__Lysobacter	1.73815			-
k__Bacteria.p__Desulfobacterota.c__Desulfobacteria.o__Desulfobacterales.f__Desulfosarcinaceae.g__Sva0081_sediment_group	1.03567			-
k__Bacteria.p__Deferribacterota.c__Deferribacteres.o__Deferribacterales.f__Deferribacteraceae.g__Mucispirillum	4.58674			-
k__Bacteria.p__Proteobacteria.c__Gammaproteobacteria.o__Burkholderiales.f__Gallionellaceae	0.956676			-
k__Bacteria.p__Acidobacteriota.c__Thermoanaerobaculia.o__Thermoanaerobaculales.f__Thermoanaerobaculaceae.g__Subgroup_10	1.20443			-
k__Bacteria.p__Acidobacteriota.c__Subgroup_11	0.56407			-
k__Bacteria.p__Proteobacteria.c__Gammaproteobacteria.o__R7C24.f__R7C24.g__R7C24	1.25502			0.0212546
k__Bacteria.p__Proteobacteria.c__Gammaproteobacteria.o__Pseudomonadales	2.0486			-
k__Bacteria.p__Actinobacteriota.c__Rubrobacteria.o__Rubrobacterales.f__Rubrobacteriaceae	1.04875			-
k__Bacteria.p__Proteobacteria.c__Alphaproteobacteria.o__Defluviicoccales	0.547207			-
k__Bacteria.p__Proteobacteria.c__Gammaproteobacteria.o__Cellvibrionales	1.57871			-
k__Bacteria.p__Gemmatimonadota.c__Gemmatimonadetes.o__Gemmatimonadales	2.74402			-
k__Bacteria.p__Firmicutes.c__Bacilli.o__Staphylococcales.f__Staphylococcaceae	1.75691			-
k__Bacteria.p__Actinobacteriota.c__Acidimicrobiia.Other.Other	0.958959			-
k__Bacteria.p__Myxococcota.c__Polyangia.o__Polyangiales.f__Phaselicystidaceae	0.732586			-
k__Bacteria.p__Actinobacteriota.c__Thermoleophilia.o__Gaiellales.f__uncultured.g__uncultured	2.52973			0.00130766
k__Bacteria.p__Proteobacteria.c__Alphaproteobacteria.o__Azospirillales	1.09938			-
k__Bacteria.p__Proteobacteria.c__Alphaproteobacteria.o__Sphingomonadales.f__Sphingomonadaceae.g__Sandarakinorhabdus	0.668381			-
k__Bacteria.p__Firmicutes.c__Clostridia.o__Lachnospirales.f__Lachnospiraceae.g__Eisenbergiella	1.67045			-
k__Bacteria.p__Firmicutes.c__Bacilli.o__Bacillales.f__Bacillaceae.g__uncultured	0.576518			-
k__Bacteria.p__Actinobacteriota.c__Actinobacteria.o__Streptosporangiales	1.77886			0.0217648
k__Bacteria.p__Proteobacteria.c__Gammaproteobacteria.o__Burkholderiales.f__Nitrosomonadaceae	2.48903			-
k__Bacteria.p__Proteobacteria.c__Gammaproteobacteria.o__Burkholderiales.f__Comamonadaceae.g__Aquabacterium	0.983051			-
k__Bacteria.p__Proteobacteria.c__Alphaproteobacteria.o__SAR11_clade.f__Clade_III.g__Clade_III	2.1832			0.000778439
k__Bacteria.p__Firmicutes.c__Clostridia.o__Lachnospirales.f__Lachnospiraceae.g__uncultured	4.36379			-
k__Bacteria.p__Actinobacteriota.c__MB_A2_108.o__MB_A2_108	2.02857			0.000233733
k__Bacteria.p__Firmicutes.c__Clostridia.o__Oscillospirales.f__Oscillospiraceae	4.93596	Lowdose	4.49463	2.8e-05
k__Bacteria.p__Acidobacteriota.c__Acidobacteriae.Other.Other.Other	0.866573			-
k__Bacteria.p__Proteobacteria.c__Alphaproteobacteria.o__Acetobacterales.f__Acetobacteraceae.g__Roseomonas	0.90744			-
k__Bacteria.p__Actinobacteriota.c__Actinobacteria.o__Streptosporangiales.f__Streptosporangiaceae	0.198055			-
k__Bacteria.p__Bacteroidota.c__Bacteroidia.o__Bacteroidales.f__Rs_E47_termite_group.g__Rs_E47_termite_group	3.9193			-
k__Bacteria.p__Proteobacteria.c__Gammaproteobacteria.o__Burkholderiales.f__Comamonadaceae.Other	1.87367			-
k__Bacteria.p__Verrucomicrobiota.c__Verrucomicrobiae.o__Pedosphaerales.f__Pedosphaeraceae.g__Ellin516	0.95659			-
k__Bacteria.p__Proteobacteria.c__Gammaproteobacteria.o__JG36_TzT_191.f__JG36_TzT_191	0.567938			-
k__Bacteria.p__Proteobacteria.c__Gammaproteobacteria.o__Burkholderiales.f__Sutterellaceae.g__AAP99	0.760957			-
k__Bacteria.p__Proteobacteria.c__Alphaproteobacteria.o__Rhizobiales.f__Rhizobiales_Incertae_Sedis.g__Alsobacter	0.687174			-
k__Bacteria.p__Spirochaetota.c__Spirochaetia.o__Spirochaetales.f__Spirochaetaceae.g__Salinispira	0.630388			-
k__Bacteria.p__Actinobacteriota.c__Rubrobacteria.o__Rubrobacterales	1.04875			-
k__Bacteria.p__Proteobacteria.c__Gammaproteobacteria.o__Burkholderiales.f__Comamonadaceae.g__Limnohabitans	1.75214			0.000255791
k__Bacteria.p__Proteobacteria.c__Gammaproteobacteria.o__Burkholderiales.f__Burkholderiaceae.g__Polynucleobacter	1.74036			6.42e-05
k__Bacteria.p__Proteobacteria.c__Gammaproteobacteria.o__Oceanospirillales.f__Pseudohongiellaceae	0.813572			0.011828
k__Bacteria.p__SAR324_clade_Marine_group_B_.c__SAR324_clade_Marine_group_B_.o__SAR324_clade_Marine_group_B_	0.644869			-
k__Bacteria.p__Actinobacteriota.c__Acidimicrobiia.o__Actinomarinales.f__uncultured.g__uncultured	0.549117			-
k__Bacteria.p__Actinobacteriota.c__Actinobacteria.o__Frankiales.f__Nakamurellaceae	0.496688			-
k__Bacteria.p__Proteobacteria.c__Alphaproteobacteria.o__Rhizobiales.f__Amb_16S_1323	1.17122			-
k__Bacteria.p__Desulfobacterota.c__Desulfobaccia.o__Desulfobaccales	1.43141			-
k__Bacteria.p__Acidobacteriota.c__Thermoanaerobaculia	1.20443			-
k__Bacteria.p__Firmicutes.c__Bacilli.o__Lactobacillales.f__Aerococcaceae.g__Facklamia	0.468706			-
k__Bacteria.p__Proteobacteria.c__Alphaproteobacteria.o__Caulobacterales.f__Hyphomonadaceae.g__Hirschia	1.16751			-
k__Bacteria.p__Firmicutes.c__Clostridia.Other.Other	3.46042			0.0176822
k__Bacteria.p__Desulfobacterota.c__Syntrophorhabdia.o__Syntrophorhabdales.f__Syntrophorhabdaceae.g__Syntrophorhabdus	1.4326			-
k__Bacteria.p__Gemmatimonadota	2.76498			-
k__Bacteria.p__Proteobacteria.Other	2.47269			2.63e-05
k__Bacteria.p__Proteobacteria.c__Alphaproteobacteria.o__Rhizobiales.f__Xanthobacteraceae.g__Tardiphaga	0.87569			-
k__Bacteria.p__Actinobacteriota.c__Thermoleophilia.o__Solirubrobacterales.f__Solirubrobacteraceae.g__Solirubrobacter	0.955849			-
k__Bacteria.p__Desulfobacterota.c__Desulfovibrionia.o__Desulfovibrionales.f__Desulfovibrionaceae.g__Bilophila	3.68981			0.00487251
k__Bacteria.p__Proteobacteria.c__Gammaproteobacteria.o__Burkholderiales.f__Alcaligenaceae.g__Paralcaligenes	0.473515			-
k__Bacteria.Other.Other.Other	3.54351			0.010607
k__Bacteria.p__Firmicutes.c__Bacilli.o__Lactobacillales.f__Leuconostocaceae	0.552293			-
k__Bacteria.p__Proteobacteria.c__Alphaproteobacteria.o__Rhizobiales.f__Rhizobiaceae.g__Mesorhizobium	1.17238			-
k__Bacteria.p__Proteobacteria.c__Gammaproteobacteria.o__Burkholderiales.f__Burkholderiaceae.g__Ralstonia	1.59097			0.0150011
k__Bacteria.p__Acidobacteriota.c__Acidobacteriae.o__Acidobacteriales.f__uncultured.g__uncultured	2.916			0.000610974
k__Bacteria.p__Myxococcota.c__Polyangia.o__Polyangiales.f__Polyangiaceae	1.0264			-
k__Bacteria.p__Actinobacteriota.c__Actinobacteria.o__Propionibacteriales.f__Nocardioidaceae.g__Nocardioides	1.29159			-
k__Bacteria.p__Bacteroidota.c__Bacteroidia.o__Bacteroidales.f__Muribaculaceae.Other	3.28586			0.0165424
k__Bacteria.p__Firmicutes.c__Clostridia.o__Oscillospirales.f__Oscillospiraceae.g__NK4A214_group	2.43502			1.82e-05
k__Bacteria.p__Myxococcota.c__bacteriap25	1.10525			-
k__Bacteria.p__Firmicutes.c__Clostridia.o__Lachnospirales.f__Lachnospiraceae.g__Roseburia	3.98814			0.00119961
k__Bacteria.p__Cyanobacteria.c__Cyanobacteriia	0.805448			0.0122896
k__Bacteria.p__Actinobacteriota.c__Actinobacteria.o__Frankiales.f__Sporichthyaceae.g__Sporichthyaceae	1.70016			0.00155401
k__Bacteria.p__Proteobacteria.c__Gammaproteobacteria.o__Enterobacterales.f__Enterobacteriaceae.Other	2.1279			-
k__Bacteria.p__Fusobacteriota	2.02989			-
k__Bacteria.p__Proteobacteria.c__Alphaproteobacteria.o__Kiloniellales.f__Kiloniellaceae.g__Pelagibius	1.06208			-
k__Bacteria.p__Cyanobacteria	0.901573			-
k__Bacteria.p__Elusimicrobiota.c__Lineage_IIa.o__Lineage_IIa	0.779586			0.0462361
k__Bacteria.p__Acidobacteriota.c__Blastocatellia	1.2609			-
k__Bacteria.p__Proteobacteria.c__Gammaproteobacteria.o__Gammaproteobacteria_Incertae_Sedis.f__Unknown_Family.g__Acidibacter	2.00215			-
k__Bacteria.p__Proteobacteria.c__Gammaproteobacteria.o__Burkholderiales.f__Oxalobacteraceae.Other	0.909239			-
k__Bacteria.p__Firmicutes.c__Clostridia.o__Clostridiales.f__Clostridiaceae.Other	1.20973			-
k__Bacteria.p__Bacteroidota.c__Bacteroidia.o__Chitinophagales.f__uncultured	0.857731			-
k__Bacteria.p__Verrucomicrobiota.c__Verrucomicrobiae.o__Verrucomicrobiales.f__Akkermansiaceae.g__Akkermansia	2.05999			-
k__Bacteria.p__Proteobacteria.c__Alphaproteobacteria.o__Rhizobiales.f__Methylopilaceae.Other	0.850147			-
k__Bacteria.p__Patescibacteria.c__Saccharimonadia.o__Saccharimonadales.f__S32	0.212961			-
k__Bacteria.p__Desulfobacterota.c__Syntrophobacteria.o__Syntrophobacterales.f__Syntrophobacteraceae.g__uncultured	1.25482			0.0334083
k__Bacteria.p__Proteobacteria.c__Gammaproteobacteria.o__Oceanospirillales.f__Pseudohongiellaceae.g__Pseudohongiella	0.813572			0.011828
k__Bacteria.p__Proteobacteria.c__Alphaproteobacteria.o__Acetobacterales.f__Acetobacteraceae.g__uncultured	1.33632			-
k__Bacteria.p__Myxococcota.c__Polyangia.o__Polyangiales.f__Polyangiaceae.g__Pajaroellobacter	0.958446			-
k__Bacteria.p__Acidobacteriota	3.2738			0.000586517
k__Bacteria.p__Elusimicrobiota.c__Elusimicrobia.o__MVP_88	0.506173			-
k__Bacteria.p__Actinobacteriota.c__Actinobacteria.o__Corynebacteriales	2.29096			-
k__Bacteria.p__Acidobacteriota.c__Acidobacteriae	3.25502			0.000386221
k__Bacteria.p__Proteobacteria.c__Alphaproteobacteria.o__Rickettsiales.f__AB1	0.505411			-
k__Bacteria.p__Firmicutes.c__Clostridia.o__Oscillospirales.f__Ruminococcaceae.g__Paludicola	3.13689			0.00061193
k__Bacteria.p__Actinobacteriota.c__Actinobacteria.o__PeM15	1.41555			6.42e-05
k__Bacteria.p__Proteobacteria.c__Gammaproteobacteria.o__KF_JG30_C25.f__KF_JG30_C25.g__KF_JG30_C25	1.0106			-
k__Bacteria.p__Actinobacteriota.c__Actinobacteria.o__Micrococcales.f__Intrasporangiaceae	1.50845			-
k__Bacteria.p__Proteobacteria.c__Gammaproteobacteria.o__Xanthomonadales.f__Rhodanobacteraceae	2.40652			-
k__Bacteria.p__MBNT15.c__MBNT15	1.93892			0.00340288
k__Bacteria.p__Proteobacteria.c__Gammaproteobacteria.o__JG36_TzT_191	0.567938			-
k__Bacteria.p__Bacteroidota.c__Bacteroidia.o__Bacteroidales.Other.Other	4.26848			0.000556915
k__Bacteria.p__Firmicutes.c__Clostridia.o__Monoglobales.f__Monoglobaceae.g__Monoglobus	2.52165			6.41e-06
k__Bacteria.p__Proteobacteria.c__Gammaproteobacteria.o__Alteromonadales.f__Alteromonadaceae.g__Rheinheimera	1.33252			-
k__Bacteria.p__Bacteroidota.c__Bacteroidia.o__Bacteroidales.f__Muribaculaceae.g__Muribaculaceae	5.64718	Control	5.27471	0.000730518
k__Bacteria.p__Proteobacteria.c__Alphaproteobacteria.o__Rhizobiales.f__Methyloligellaceae	1.77135			0.0054096
k__Bacteria.p__Bacteroidota.c__Bacteroidia.o__Cytophagales.f__Cytophagaceae.g__Rhodocytophaga	0.484981			-
k__Bacteria.p__Myxococcota.c__Polyangia.o__Polyangiales.f__Sandaracinaceae.g__Sandaracinus	0.809183			-
k__Bacteria.p__Actinobacteriota.c__Actinobacteria.o__Frankiales.f__Sporichthyaceae.g__hgcI_clade	1.76966			1.39e-05
k__Bacteria.p__Actinobacteriota.c__Actinobacteria.o__Kineosporiales	1.2868			0.036313
k__Bacteria.p__Firmicutes.c__Clostridia.o__Oscillospirales.f__Ruminococcaceae.g__UBA1819	3.19918			-
k__Bacteria.p__Myxococcota.c__Myxococcia.o__Myxococcales.f__Anaeromyxobacteraceae.g__Anaeromyxobacter	0.484981			-
k__Bacteria.p__Acidobacteriota.c__Acidobacteriae.o__Subgroup_2	2.15566			0.0186963
k__Bacteria.p__Proteobacteria.c__Gammaproteobacteria.o__Burkholderiales.f__Nitrosomonadaceae.g__Nitrosospira	1.60696			-
k__Bacteria.p__Bacteroidota.c__Bacteroidia.o__Sphingobacteriales.f__AKYH767	0.65897			-
k__Bacteria.p__Proteobacteria.c__Gammaproteobacteria.o__Burkholderiales.f__SC_I_84	2.29584			0.0146979
k__Bacteria.p__Acidobacteriota.c__Acidobacteriae.o__Subgroup_13.f__Subgroup_13.g__Subgroup_13	1.43711			-
k__Bacteria.p__Proteobacteria.c__Gammaproteobacteria.o__Burkholderiales.f__Alcaligenaceae.g__Candidimonas	0.766161			-
k__Bacteria.p__Firmicutes.c__Clostridia.o__Oscillospirales.Other	2.2196			-
k__Bacteria.p__Actinobacteriota.c__Actinobacteria.o__Micrococcales.f__Microbacteriaceae.g__Candidatus_Limnoluna	1.6986			0.00265565
k__Bacteria.p__Gemmatimonadota.c__Gemmatimonadetes	2.74402			-
k__Bacteria.p__Proteobacteria.c__Alphaproteobacteria.o__Rickettsiales.f__Rickettsiaceae	1.31855			1.61e-05
k__Bacteria.p__Firmicutes.c__Bacilli.o__Exiguobacterales.f__Exiguobacteraceae	0.741777			-
k__Bacteria.p__Proteobacteria.c__Gammaproteobacteria.o__Burkholderiales.f__Nitrosomonadaceae.g__mle1_7	1.63891			-
k__Bacteria.p__Proteobacteria.c__Gammaproteobacteria.o__Gammaproteobacteria_Incertae_Sedis.f__Unknown_Family.g__Candidatus_Berkiella	0.244259			-
k__Bacteria.p__Bacteroidota.c__Bacteroidia.o__Cytophagales.f__Microscillaceae.g__Chryseolinea	1.59719			-
k__Bacteria.p__Elusimicrobiota.c__Lineage_IIa.o__Lineage_IIa.f__Lineage_IIa	0.779586			0.0462361
k__Bacteria.p__Bacteroidota.c__Bacteroidia.o__Bacteroidales.f__Bacteroidaceae.g__Bacteroides	5.39889	Model	5.03988	1.17e-06
k__Bacteria.p__Proteobacteria.c__Gammaproteobacteria.o__Salinisphaerales.f__Solimonadaceae.g__Polycyclovorans	0.676881			-
k__Bacteria.p__Acidobacteriota.c__Subgroup_5.o__Subgroup_5.f__Subgroup_5	1.41035			-
k__Bacteria.p__Actinobacteriota.c__Actinobacteria.o__Streptomycetales.f__Streptomycetaceae.g__Kitasatospora	2.00174			-
k__Bacteria.p__Gemmatimonadota.c__BD2_11_terrestrial_group.o__BD2_11_terrestrial_group.f__BD2_11_terrestrial_group.g__BD2_11_terrestrial_group	0.660155			-
k__Bacteria.p__Bacteroidota.c__Bacteroidia.o__Flavobacteriales.f__Crocinitomicaceae	0.819042			-
k__Bacteria.p__Firmicutes.c__Clostridia.o__Peptostreptococcales_Tissierellales	3.20153			0.00203021
k__Bacteria.p__Actinobacteriota.c__Actinobacteria.o__Streptosporangiales.f__Thermomonosporaceae.g__Actinomadura	1.09953			-
k__Bacteria.p__Firmicutes.c__Clostridia.o__Oscillospirales	5.0257	Lowdose	4.562	5.17e-05
k__Bacteria.p__Proteobacteria.c__Gammaproteobacteria.o__JTB23.f__JTB23.g__JTB23	0.518012			-
k__Bacteria.p__Acidobacteriota.c__Holophagae.o__Subgroup_7	1.72494			0.0232462
k__Bacteria.p__Actinobacteriota.c__Actinobacteria.o__Micrococcales.f__Cellulomonadaceae.g__Cellulomonas	0.557255			-
k__Bacteria.p__Gemmatimonadota.c__S0134_terrestrial_group.o__S0134_terrestrial_group.f__S0134_terrestrial_group	1.52409			-
k__Bacteria.p__Firmicutes.c__Bacilli.o__Staphylococcales	1.8454			-
k__Bacteria.p__Actinobacteriota.c__Actinobacteria.o__Micrococcales.f__Microbacteriaceae	1.80999			-
k__Bacteria.p__Proteobacteria.c__Gammaproteobacteria.o__PLTA13	1.36104			-
k__Bacteria.p__Acidobacteriota.c__Acidobacteriae.o__AKIW659	0.987603			-
k__Bacteria.p__Fibrobacterota.c__Fibrobacteria.o__Fibrobacterales	0.213837			-
k__Bacteria.p__Firmicutes.c__Clostridia.o__Lachnospirales.f__Lachnospiraceae.g__A2	3.35754			-
k__Bacteria.p__Acidobacteriota.c__Acidobacteriae.o__GOUTB8.f__GOUTB8.g__GOUTB8	1.35385			0.00672013
k__Bacteria.p__NB1_j	1.04423			-
k__Bacteria.p__Bacteroidota.c__Bacteroidia.o__Cytophagales.f__Cyclobacteriaceae	1.29616			-
k__Bacteria.p__Bacteroidota.c__Bacteroidia.o__Chitinophagales.f__Chitinophagaceae.g__Flavisolibacter	1.8448			-
k__Bacteria.p__Actinobacteriota.c__Actinobacteria.o__Micromonosporales.f__Micromonosporaceae.g__Hamadaea	1.65719			0.00340429
k__Bacteria.p__Actinobacteriota.c__Actinobacteria.Other.Other	0.505076			-
k__Bacteria.p__Proteobacteria.c__Gammaproteobacteria.o__Legionellales.f__Legionellaceae.g__Legionella	0.819042			-
k__Bacteria.p__Proteobacteria.c__Gammaproteobacteria.o__Burkholderiales.f__Methylophilaceae	1.466			0.00097473
k__Bacteria.p__Proteobacteria.c__Alphaproteobacteria.o__Paracaedibacterales	0.90647			0.0337079
k__Bacteria.p__Desulfobacterota.c__Desulfuromonadia	1.96525			0.0391912
k__Bacteria.p__Bacteroidota.c__Bacteroidia.o__Chitinophagales.f__Chitinophagaceae.g__Ferruginibacter	0.492004			-
k__Bacteria.p__Firmicutes.c__Clostridia.o__Lachnospirales.f__Lachnospiraceae.g__GCA_900066575	3.91799			0.00281022
k__Bacteria.p__Firmicutes.c__Clostridia.o__Oscillospirales.f__Ruminococcaceae.g__Ruminococcus	2.22134			0.00571679
k__Bacteria.p__Proteobacteria.c__Gammaproteobacteria.o__Enterobacterales.f__Enterobacteriaceae.g__Escherichia_Shigella	4.3314			-
k__Bacteria.p__Verrucomicrobiota.c__Verrucomicrobiae.o__Verrucomicrobiales	2.05999			-
k__Bacteria.p__Actinobacteriota.c__Actinobacteria.o__Micrococcales.f__Micrococcaceae.g__Pseudarthrobacter	1.62555			-
k__Bacteria.p__Bacteroidota.c__Bacteroidia.o__Flavobacteriales.f__Flavobacteriaceae.g__uncultured	2.75189			0.000646978
k__Bacteria.p__Actinobacteriota.c__Actinobacteria.o__Micrococcales	2.14822			-
k__Bacteria.p__Bacteroidota.c__Bacteroidia.o__Flavobacteriales.f__Flavobacteriaceae	2.78168			0.00136786
k__Bacteria.p__Actinobacteriota.c__Actinobacteria.o__Catenulisporales	1.82062			2.36e-05
k__Bacteria.p__Proteobacteria.c__Alphaproteobacteria.o__Reyranellales.f__Reyranellaceae.g__Reyranella	1.79547			-
k__Bacteria.p__Firmicutes.c__Clostridia.o__Clostridia_vadinBB60_group.f__Clostridia_vadinBB60_group.g__Clostridia_vadinBB60_group	3.89742			0.00596376
k__Bacteria.p__Proteobacteria.c__Alphaproteobacteria.o__Micropepsales	2.21371			-
k__Bacteria.p__Acidobacteriota.c__Subgroup_22.o__Subgroup_22	1.0823			-
k__Bacteria.p__Fibrobacterota.c__Fibrobacteria.o__Fibrobacterales.f__Fibrobacteraceae.g__possible_genus_04	0.213837			-
k__Bacteria.p__Gemmatimonadota.c__Longimicrobia.o__Longimicrobiales	0.807872			-
k__Bacteria.p__Actinobacteriota.c__Thermoleophilia.o__Solirubrobacterales.f__67_14.g__67_14	1.51924			0.0056687
k__Bacteria.p__Firmicutes.c__Clostridia.o__Lachnospirales.f__Lachnospiraceae.g___Eubacterium__fissicatena_group	3.34318			0.000131779
k__Bacteria.p__Verrucomicrobiota.c__Verrucomicrobiae.o__Pedosphaerales.f__Pedosphaeraceae.g__uncultured	0.786169			0.0155079
k__Bacteria.p__Firmicutes.c__Clostridia.o__Lachnospirales.f__Lachnospiraceae.g__Anaerostipes	1.38055			-
k__Bacteria.p__Firmicutes.c__Bacilli.o__Mycoplasmatales	2.53829			-
k__Bacteria.p__Proteobacteria.c__Gammaproteobacteria.o__Burkholderiales.f__Hydrogenophilaceae.g__Thiobacillus	0.80792			-
k__Bacteria.p__Desulfobacterota.c__Desulfuromonadia.o__Geobacterales.f__Geobacteraceae.Other	1.40634			-
k__Bacteria.p__Firmicutes.c__Bacilli.o__Erysipelotrichales	5.15059	Model	4.83889	1.48e-06
k__Bacteria.p__Proteobacteria.c__Gammaproteobacteria.o__Gammaproteobacteria_Incertae_Sedis.f__Unknown_Family.g__Unknown_Family	0.500481			-
k__Bacteria.p__Chloroflexi.c__Dehalococcoidia.Other	0.446275			-
k__Bacteria.p__Desulfobacterota	4.55216	Lowdose	4.10108	0.0405721
k__Bacteria.p__Proteobacteria.c__Alphaproteobacteria.o__Caulobacterales.f__Caulobacteraceae.g__Phenylobacterium	1.64251			-
k__Bacteria.p__Proteobacteria.c__Gammaproteobacteria.o__Pasteurellales.f__Pasteurellaceae.g__Rodentibacter	0.915952			-
k__Bacteria.p__Proteobacteria.c__Gammaproteobacteria.Other	0.807019			-
k__Bacteria.p__Actinobacteriota.c__Actinobacteria.o__Corynebacteriales.f__Corynebacteriaceae	2.03228			-
k__Bacteria.p__Proteobacteria.c__Gammaproteobacteria.o__Burkholderiales.f__Oxalobacteraceae.g__Noviherbaspirillum	1.59404			-
k__Bacteria.p__Proteobacteria.c__Gammaproteobacteria.o__Burkholderiales.f__Comamonadaceae.g__Rhizobacter	1.23906			-
k__Bacteria.p__Chloroflexi.c__Anaerolineae.o__SJA_15	1.29251			-
k__Bacteria.p__Bacteroidota.c__Bacteroidia.o__Chitinophagales.f__Chitinophagaceae.g__UTBCD1	1.2838			-
k__Bacteria.p__Proteobacteria.c__Alphaproteobacteria.o__Rhizobiales.f__Rhizobiales_Incertae_Sedis.g__uncultured	1.86258			0.0103204
k__Bacteria.p__Bacteroidota.c__Bacteroidia.o__Chitinophagales.f__Chitinophagaceae.g__Chitinophaga	0.911805			-
k__Bacteria.p__Proteobacteria.c__Alphaproteobacteria.o__Azospirillales.f__Inquilinaceae	0.967318			-
k__Bacteria.p__Firmicutes.c__Clostridia.o__Oscillospirales.f__UCG_010	2.15859			0.000724371
k__Bacteria.p__Proteobacteria.c__Gammaproteobacteria.Other.Other.Other	0.807019			-
k__Bacteria.p__MBNT15	1.93892			0.00340288
k__Bacteria.p__Cyanobacteria.c__Cyanobacteriia.Other.Other.Other	0.685198			-
k__Bacteria.p__Firmicutes.c__Clostridia.o__Oscillospirales.f__UCG_010.g__UCG_010	2.15859			0.000724371
k__Bacteria.p__Proteobacteria.c__Gammaproteobacteria.o__JTB23.f__JTB23	0.518012			-
k__Bacteria.p__Firmicutes.c__Clostridia.o__Peptococcales.f__Peptococcaceae.g__uncultured	1.85756			-
k__Bacteria.p__Desulfobacterota.c__Desulfuromonadia.o__Geobacterales.f__Geobacteraceae.g__uncultured	1.51107			-
k__Bacteria.p__Proteobacteria.c__Alphaproteobacteria.o__SAR11_clade	2.1832			0.000778439
k__Bacteria.p__Gemmatimonadota.c__AKAU4049.o__AKAU4049.f__AKAU4049	1.17122			-
k__Bacteria.p__Proteobacteria.c__Alphaproteobacteria.o__Rhizobiales.f__KF_JG30_B3	1.43774			-
k__Bacteria.p__Actinobacteriota.c__Coriobacteriia.o__Coriobacteriales.f__Eggerthellaceae.g__Parvibacter	2.07179			0.0335376
k__Bacteria.p__Fusobacteriota.c__Fusobacteriia	2.02989			-
k__Bacteria.p__Firmicutes.c__Clostridia.o__Lachnospirales	5.2476			-
k__Bacteria.p__Proteobacteria.c__Gammaproteobacteria.o__Burkholderiales.f__Oxalobacteraceae.g__Actimicrobium	1.61492			-
k__Bacteria.p__Proteobacteria.c__Alphaproteobacteria.o__Acetobacterales	1.46426			-
k__Bacteria.p__Patescibacteria.c__Saccharimonadia.o__Saccharimonadales.f__LWQ8.g__LWQ8	0.915952			-
k__Bacteria.p__Verrucomicrobiota.c__Verrucomicrobiae.o__Pedosphaerales.f__Pedosphaeraceae.Other	0.689602			-
k__Bacteria.p__Bacteroidota.c__Bacteroidia.o__Bacteroidales.f__Muribaculaceae	5.65196	Control	5.28025	0.000727485
k__Bacteria.p__Gemmatimonadota.c__Longimicrobia	0.807872			-
k__Bacteria.p__Firmicutes.c__Clostridia.o__Oscillospirales.f__Oscillospiraceae.g__Oscillibacter	3.80147			0.00192789
k__Bacteria.p__Campilobacterota.c__Campylobacteria.o__Campylobacterales.f__Helicobacteraceae.g__Helicobacter	4.91918	Control	4.55202	0.00693383
k__Bacteria.p__Firmicutes.c__Bacilli.o__Lactobacillales.f__Leuconostocaceae.g__Weissella	0.552293			-
k__Bacteria.p__Proteobacteria.c__Alphaproteobacteria.o__Rhizobiales.f__Rhizobiaceae	1.87692			-
k__Bacteria.p__Proteobacteria.c__Alphaproteobacteria.o__Rhizobiales.f__Xanthobacteraceae.g__Bradyrhizobium	1.9625			-
k__Bacteria.p__Proteobacteria.c__Alphaproteobacteria.o__Caulobacterales.f__Caulobacteraceae.Other	1.52346			-
k__Bacteria.p__Bacteroidota.c__Kryptonia.o__Kryptoniales.f__BSV26.g__BSV26	1.57623			0.0203872
k__Bacteria.p__Actinobacteriota.c__Actinobacteria.Other.Other.Other	0.505076			-
k__Bacteria.p__Firmicutes.c__Clostridia.Other	3.46042			0.0176822
k__Bacteria.p__Bacteroidota.c__Bacteroidia.o__Chitinophagales.f__Saprospiraceae	1.60862			0.0419824
k__Bacteria.p__Firmicutes.c__Clostridia.o__Lachnospirales.f__Lachnospiraceae	5.2476			-
k__Bacteria.p__Proteobacteria.c__Gammaproteobacteria.o__Pseudomonadales.f__Moraxellaceae	0.928068			-
k__Bacteria.p__Spirochaetota.c__Spirochaetia.o__Spirochaetales	0.630388			-
k__Bacteria.p__Proteobacteria.c__Alphaproteobacteria.o__Sphingomonadales.f__Sphingomonadaceae.g__Plot4_2H12	1.15709			-
k__Bacteria.p__Desulfobacterota.c__Syntrophorhabdia.o__Syntrophorhabdales	1.4326			-
k__Bacteria.p__Acidobacteriota.c__Holophagae.o__Holophagales.f__Holophagaceae	0.974628			-
k__Bacteria.p__Proteobacteria.c__Alphaproteobacteria.o__uncultured.f__uncultured.g__uncultured	2.06614			-
k__Bacteria.p__Proteobacteria.c__Gammaproteobacteria.o__Burkholderiales.f__Oxalobacteraceae	2.11941			-
k__Bacteria.p__Actinobacteriota.c__Acidimicrobiia.o__uncultured	0.476438			-
k__Bacteria.p__Patescibacteria.c__Parcubacteria.o__Parcubacteria	0.485479			-
k__Bacteria.p__Bacteroidota.c__Bacteroidia.Other.Other	1.83683			0.000106131
k__Bacteria.p__Actinobacteriota.c__Thermoleophilia.o__Solirubrobacterales.f__Solirubrobacteraceae	1.25464			-
k__Bacteria.p__Bacteroidota.c__Bacteroidia.o__Cytophagales	1.93995			-
k__Bacteria.p__Proteobacteria.c__Alphaproteobacteria.o__Caedibacterales	0.512797			-
k__Bacteria.p__Proteobacteria.c__Gammaproteobacteria.o__Burkholderiales.f__Sutterellaceae	4.97438	Model	4.67946	4.28e-06
k__Bacteria.p__Actinobacteriota	4.45151	FeSO4	4.13303	0.000100259
k__Bacteria.p__Bacteroidota.c__SJA_28.o__SJA_28	1.59907			0.0342574
k__Bacteria.p__Proteobacteria.c__Alphaproteobacteria.o__Caulobacterales.f__Caulobacteraceae	1.88932			-
k__Bacteria.p__Firmicutes.c__Clostridia.o__Oscillospirales.f__Oscillospirales	1.10602			-
k__Bacteria.p__Fusobacteriota.c__Fusobacteriia.o__Fusobacteriales.f__Fusobacteriaceae.g__Cetobacterium	2.02989			-
k__Bacteria.p__Proteobacteria.c__Gammaproteobacteria.o__Steroidobacterales.f__Steroidobacteraceae.g__Steroidobacter	1.2692			-
k__Bacteria.p__Actinobacteriota.c__Actinobacteria.o__Catenulisporales.f__Actinospicaceae.g__Actinospica	1.82062			2.36e-05
k__Bacteria.p__Proteobacteria.c__Alphaproteobacteria.o__Reyranellales.f__Reyranellaceae.g__uncultured	1.21111			-
k__Bacteria.p__Proteobacteria.c__Alphaproteobacteria.o__Rickettsiales	1.35239			1.15e-05
k__Bacteria.p__Chloroflexi.c__Dehalococcoidia	0.446275			-
k__Bacteria.p__Verrucomicrobiota.c__Chlamydiae.o__Chlamydiales.f__Parachlamydiaceae	0.506173			-
k__Bacteria.p__Acidobacteriota.c__Acidobacteriae.o__AKIW659.f__AKIW659.g__AKIW659	0.987603			-
k__Bacteria.p__Firmicutes.c__Clostridia.o__Oscillospirales.f__Ruminococcaceae.g__Faecalibacterium	1.29194			-
k__Bacteria.p__Myxococcota.c__Polyangia	2.1384			-
k__Bacteria.p__Actinobacteriota.c__Actinobacteria.o__Micromonosporales.f__Micromonosporaceae.g__uncultured	1.40679			0.0406954
k__Bacteria.p__Proteobacteria.c__Alphaproteobacteria.o__Rhodobacterales.f__Rhodobacteraceae.g__Pseudorhodobacter	1.85388			7.41e-05
k__Bacteria.p__Proteobacteria.c__Gammaproteobacteria.o__Burkholderiales.f__Oxalobacteraceae.g__Herbaspirillum	0.984694			-
k__Bacteria.p__Actinobacteriota.c__Acidimicrobiia.o__IMCC26256.f__IMCC26256.g__IMCC26256	1.86912			-
k__Bacteria.p__Elusimicrobiota.c__Lineage_IIa.o__Lineage_IIa.f__Lineage_IIa.g__Lineage_IIa	0.779586			0.0462361
k__Bacteria.p__Actinobacteriota.c__Acidimicrobiia.o__Microtrichales.f__Ilumatobacteraceae.g__uncultured	0.576518			-
k__Bacteria.p__Actinobacteriota.c__Rubrobacteria.o__Rubrobacterales.f__Rubrobacteriaceae.g__Rubrobacter	1.04875			-
k__Bacteria.p__Proteobacteria.c__Gammaproteobacteria.o__Diplorickettsiales	1.36821			-
k__Bacteria.p__Firmicutes.c__Bacilli.o__Erysipelotrichales.f__Erysipelotrichaceae.g__Dubosiella	3.83584			-
k__Bacteria.p__Myxococcota.c__Polyangia.o__Polyangiales.f__Phaselicystidaceae.g__Phaselicystis	0.732586			-
k__Bacteria.p__Bacteroidota	5.80482			-
k__Bacteria.p__Gemmatimonadota.c__AKAU4049.o__AKAU4049.f__AKAU4049.g__AKAU4049	1.17122			-
k__Bacteria.p__Actinobacteriota.c__MB_A2_108	2.02857			0.000233733
k__Bacteria.p__Gemmatimonadota.c__BD2_11_terrestrial_group.o__BD2_11_terrestrial_group	0.660155			-
k__Bacteria.p__Proteobacteria.c__Gammaproteobacteria.o__Burkholderiales.f__Oxalobacteraceae.g__Massilia	1.60473			-
k__Bacteria.p__Proteobacteria.c__Gammaproteobacteria.o__Burkholderiales.f__Sutterellaceae.g__uncultured	1.56959			-
k__Bacteria.p__Bacteroidota.c__Bacteroidia.o__Bacteroidales.f__Rikenellaceae.g__Rikenella	4.0346			0.0193635
k__Bacteria.p__Desulfobacterota.c__Desulfobacteria.o__Desulfobacterales	1.03567			-
k__Bacteria.p__Proteobacteria.c__Alphaproteobacteria.o__Micropepsales.f__Micropepsaceae.g__Rhizomicrobium	0.877744			-
k__Bacteria.p__Proteobacteria.c__Gammaproteobacteria.o__Burkholderiales.f__SC_I_84.g__SC_I_84	2.29584			0.0146979
k__Bacteria.p__Verrucomicrobiota.c__Chlamydiae.o__Chlamydiales.f__Parachlamydiaceae.g__Neochlamydia	0.506173			-
k__Bacteria.p__Actinobacteriota.c__Actinobacteria.o__Catenulisporales.f__Actinospicaceae	1.82062			2.36e-05
k__Bacteria.p__Bacteroidota.c__Bacteroidia.o__Sphingobacteriales	0.65897			-
k__Bacteria.p__Firmicutes.c__Clostridia.o__Lachnospirales.f__Lachnospiraceae.g__Lachnospiraceae_NK4A136_group	4.93951	Control	4.59646	0.0001695
k__Bacteria.p__Proteobacteria.c__Gammaproteobacteria.o__Xanthomonadales.f__Rhodanobacteraceae.g__Chujaibacter	1.59474			-
k__Bacteria.p__Proteobacteria.c__Alphaproteobacteria.o__Sphingomonadales.f__Sphingomonadaceae.g__Sphingobium	1.168			-
k__Bacteria.p__Actinobacteriota.c__Actinobacteria.o__Propionibacteriales.f__Nocardioidaceae	1.57659			0.0391225
k__Bacteria.p__Gemmatimonadota.c__Gemmatimonadetes.o__Gemmatimonadales.f__Gemmatimonadaceae	2.74402			-
k__Bacteria.p__Bacteroidota.c__SJA_28.o__SJA_28.f__SJA_28	1.59907			0.0342574
k__Bacteria.p__Proteobacteria.c__Gammaproteobacteria.o__Burkholderiales.f__Burkholderiaceae.g__Burkholderia_Caballeronia_Paraburkholderia	1.94735			0.00170579
k__Bacteria.p__Actinobacteriota.c__Actinobacteria.o__Corynebacteriales.f__Mycobacteriaceae.g__Mycobacterium	1.94301			-
k__Bacteria.p__Proteobacteria.c__Gammaproteobacteria.o__Diplorickettsiales.f__Diplorickettsiaceae.g__uncultured	1.03188			-
k__Bacteria.p__Proteobacteria.c__Alphaproteobacteria.o__Sphingomonadales.f__Sphingomonadaceae.g__Sphingomonas	2.97976			0.0474262
k__Bacteria.p__Elusimicrobiota.c__Elusimicrobia.o__MVP_88.f__MVP_88.g__MVP_88	0.506173			-
k__Bacteria.p__Acidobacteriota.c__Acidobacteriae.o__Subgroup_12	0.848756			-
k__Bacteria.p__Acidobacteriota.c__Acidobacteriae.o__Subgroup_13	1.43711			-
k__Bacteria.p__Bacteroidota.c__Bacteroidia.o__Chitinophagales.f__Chitinophagaceae.g__Aurantisolimonas	0.481739			-
k__Bacteria.p__Firmicutes.c__Bacilli.Other	1.95142			6.92e-05
k__Bacteria.p__Zixibacteria.c__Zixibacteria.o__Zixibacteria.f__Zixibacteria.g__Zixibacteria	0.557255			-
k__Bacteria.p__Firmicutes.c__Clostridia.o__Lachnospirales.f__Lachnospiraceae.g__Tyzzerella	2.21649			1.72e-05
k__Bacteria.p__Proteobacteria.c__Alphaproteobacteria.o__Reyranellales.f__Reyranellaceae	1.88004			-
k__Bacteria.p__Nitrospirota.c__Thermodesulfovibrionia.o__uncultured	1.96195			-
k__Bacteria.p__Nitrospirota.c__Thermodesulfovibrionia	1.96195			-
k__Bacteria.p__Acidobacteriota.c__Acidobacteriae.o__PAUC26f.f__PAUC26f.g__PAUC26f	1.05525			-
k__Bacteria.p__Firmicutes.c__Clostridia.o__Clostridia_UCG_014	4.04269			0.000119034
k__Bacteria.p__Acidobacteriota.c__Subgroup_22.o__Subgroup_22.f__Subgroup_22	1.0823			-
k__Bacteria.p__Proteobacteria.c__Gammaproteobacteria.o__Enterobacterales.f__Enterobacteriaceae	4.33411	Highdose	4.06067	0.0457229
k__Bacteria.p__Firmicutes.Other.Other.Other	2.89163			2.96e-05
k__Bacteria.p__Actinobacteriota.c__Coriobacteriia.o__Coriobacteriales.f__Eggerthellaceae.Other	1.70372			1.34e-06
k__Bacteria.p__Cyanobacteria.c__Vampirivibrionia.o__Gastranaerophilales	0.745159			-
k__Bacteria.p__Desulfobacterota.c__Desulfovibrionia.o__Desulfovibrionales.f__Desulfovibrionaceae.Other	2.81286			0.00167174
k__Bacteria.p__Spirochaetota.c__Spirochaetia.o__Spirochaetales.f__Spirochaetaceae	0.630388			-
k__Bacteria.p__Acidobacteriota.c__Acidobacteriae.o__Subgroup_12.f__Subgroup_12.g__Subgroup_12	0.848756			-
k__Bacteria.p__Actinobacteriota.c__Acidimicrobiia.Other	0.958959			-
k__Bacteria.p__RCP2_54.c__RCP2_54.o__RCP2_54.f__RCP2_54.g__RCP2_54	1.9273			-
k__Bacteria.p__NB1_j.c__NB1_j.o__NB1_j	1.04423			-
k__Bacteria.p__Verrucomicrobiota.c__Chlamydiae	0.506173			-
k__Bacteria.p__Proteobacteria.c__Alphaproteobacteria.o__Rhodospirillales	4.2162			9.52e-06
k__Bacteria.p__Firmicutes.c__Clostridia.o__Peptostreptococcales_Tissierellales.f__Anaerovoracaceae.g__Anaerovorax	2.72527			0.0005215
k__Bacteria.p__Bacteroidota.c__Bacteroidia.o__Bacteroidales.f__Rikenellaceae.g__Alistipes	4.61766	Control	4.20598	0.000428355
k__Bacteria.p__Proteobacteria.c__Gammaproteobacteria.o__Acidiferrobacterales	0.779545			-
k__Bacteria.p__Firmicutes.c__Bacilli.o__Acholeplasmatales.f__Acholeplasmataceae.g__Anaeroplasma	3.31369			0.00986675
k__Bacteria.p__Patescibacteria.c__Parcubacteria.o__Parcubacteria.f__Parcubacteria.g__Parcubacteria	0.485479			-
k__Bacteria.p__Firmicutes.c__Clostridia.o__Christensenellales.f__Christensenellaceae	2.82985			0.00041749
k__Bacteria.p__Acidobacteriota.c__Acidobacteriae.o__Solibacterales.f__Solibacteraceae.g__Candidatus_Solibacter	2.35347			0.0206898
k__Bacteria.p__Myxococcota.c__Polyangia.o__Polyangiales.f__Polyangiaceae.g__uncultured	0.244253			-
k__Bacteria.p__Proteobacteria.c__Gammaproteobacteria.o__Burkholderiales.f__Sutterellaceae.Other	2.6088			3.46e-07
k__Bacteria.p__Proteobacteria.c__Alphaproteobacteria.o__Elsterales	1.99343			0.0102684
k__Bacteria.p__Firmicutes.c__Clostridia.o__Lachnospirales.f__Lachnospiraceae.g___Eubacterium__xylanophilum_group	3.58098			2.27e-05
k__Bacteria.p__Proteobacteria.c__Gammaproteobacteria.o__Oceanospirillales	0.813572			0.011828
k__Bacteria.p__Proteobacteria.c__Alphaproteobacteria.o__Caulobacterales.f__Hyphomonadaceae	1.73946			-
k__Bacteria.p__Acidobacteriota.c__Acidobacteriae.o__Acidobacteriales.f__uncultured	2.916			0.000610974
k__Bacteria.p__Proteobacteria.c__Gammaproteobacteria.o__Gammaproteobacteria_Incertae_Sedis	2.02195			-
k__Bacteria.p__Proteobacteria.c__Alphaproteobacteria.o__Caulobacterales.f__Caulobacteraceae.g__uncultured	0.95664			-
k__Bacteria.p__Actinobacteriota.c__Acidimicrobiia.o__IMCC26256	1.86912			-
k__Bacteria.p__Actinobacteriota.c__Actinobacteria.o__Frankiales.f__Geodermatophilaceae.g__Geodermatophilus	0.47195			-
k__Bacteria.p__Firmicutes.c__Clostridia.o__Lachnospirales.f__Lachnospiraceae.g__Lachnospiraceae_UCG_010	1.29184			-
k__Bacteria.p__Actinobacteriota.c__Acidimicrobiia.o__IMCC26256.f__IMCC26256	1.86912			-
k__Bacteria.p__Acidobacteriota.c__Blastocatellia.o__11_24	1.2609			-
k__Bacteria.p__Bacteroidota.c__Bacteroidia.o__Flavobacteriales.f__Flavobacteriaceae.g__Flavobacterium	2.04823			0.00473771
k__Bacteria.p__Acidobacteriota.c__Holophagae	1.74886			-
k__Bacteria.p__Proteobacteria.c__Gammaproteobacteria.o__Burkholderiales.f__Chromobacteriaceae.g__Pseudogulbenkiania	0.500481			-
k__Bacteria.p__Proteobacteria.c__Gammaproteobacteria.o__PLTA13.f__PLTA13.g__PLTA13	1.36104			-
k__Bacteria.p__Bacteroidota.c__Bacteroidia.o__Bacteroidales.f__Tannerellaceae.g__Parabacteroides	4.80214	Highdose	4.44638	1.46e-06
k__Bacteria.p__Patescibacteria.c__Saccharimonadia	1.55909			0.022431
k__Bacteria.p__Firmicutes.c__Clostridia.o__Oscillospirales.f__Ruminococcaceae.g__Candidatus_Soleaferrea	2.16969			8.38e-05
k__Bacteria.p__Bacteroidota.c__Bacteroidia.o__Bacteroidales.f__Marinifilaceae.g__Butyricimonas	2.94985			0.0321724
k__Bacteria.p__MBNT15.c__MBNT15.o__MBNT15.f__MBNT15	1.93892			0.00340288
k__Bacteria.p__Firmicutes.c__Clostridia.o__Oscillospirales.Other.Other	2.2196			-
k__Bacteria.p__Actinobacteriota.c__Actinobacteria.o__Corynebacteriales.f__Corynebacteriaceae.g__Corynebacterium	2.03228			-
k__Bacteria.p__Actinobacteriota.c__Actinobacteria.o__Micrococcales.f__Microbacteriaceae.g__Galbitalea	1.29932			-
k__Bacteria.p__Proteobacteria.c__Gammaproteobacteria.o__Diplorickettsiales.f__Diplorickettsiaceae.g__Aquicella	1.11056			-
k__Bacteria.p__Proteobacteria.c__Alphaproteobacteria.o__Rhizobiales.f__Hyphomicrobiaceae.g__Hyphomicrobium	0.979322			-
k__Bacteria.p__Proteobacteria.c__Alphaproteobacteria.o__Rhizobiales.f__Rhizobiaceae.g__Allorhizobium_Neorhizobium_Pararhizobium_Rhizobium	1.75704			-
k__Bacteria.p__Bacteroidota.c__Kryptonia	1.57623			0.0203872
k__Bacteria.p__Proteobacteria.c__Alphaproteobacteria.o__Rhizobiales.f__Beijerinckiaceae.g__Methylorosula	0.258155			-
k__Bacteria.p__Proteobacteria.c__Gammaproteobacteria.o__EPR3968_O8a_Bc78.f__EPR3968_O8a_Bc78	0.995133			-
k__Bacteria.p__Myxococcota.c__Polyangia.o__Haliangiales	1.97383			-
k__Bacteria.p__Firmicutes.c__Clostridia.o__Oscillospirales.f__Ruminococcaceae.g__Subdoligranulum	0.216982			-
k__Bacteria.p__Proteobacteria.c__Alphaproteobacteria.o__Rickettsiales.f__AB1.g__AB1	0.505411			-
k__Bacteria.p__Bacteroidota.c__Bacteroidia.o__Chitinophagales.f__Chitinophagaceae.g__Flavitalea	1.16504			-
k__Bacteria.p__Proteobacteria.c__Gammaproteobacteria.o__Enterobacterales.f__Thorselliaceae	0.961272			-
k__Bacteria.p__Firmicutes.c__Clostridia.o__Lachnospirales.f__Lachnospiraceae.g___Ruminococcus__torques_group	1.05818			-
k__Bacteria.p__Firmicutes.c__Bacilli.o__Exiguobacterales.f__Exiguobacteraceae.g__Exiguobacterium	0.741777			-
k__Bacteria.p__Acidobacteriota.c__Holophagae.o__Holophagales.f__Holophagaceae.g__Holophagaceae	0.244253			-
k__Bacteria.p__Acidobacteriota.c__Blastocatellia.o__11_24.f__11_24	1.2609			-
k__Bacteria.p__Actinobacteriota.c__Coriobacteriia.o__Coriobacteriales.f__Atopobiaceae.Other	2.59862			0.000747525
k__Bacteria.p__SAR324_clade_Marine_group_B_.c__SAR324_clade_Marine_group_B_	0.644869			-
k__Bacteria.p__Actinobacteriota.c__Actinobacteria.o__Pseudonocardiales.f__Pseudonocardiaceae.Other	1.05125			-
k__Bacteria.p__SAR324_clade_Marine_group_B_	0.644869			-
k__Bacteria.p__Proteobacteria.c__Alphaproteobacteria.o__Caedibacterales.f__Caedibacteraceae	0.512797			-
k__Bacteria.p__Myxococcota.c__Polyangia.o__Blfdi19	0.506198			-
k__Bacteria.p__Bacteroidota.c__Bacteroidia.o__Bacteroidales.f__Rs_E47_termite_group	3.9193			-
k__Bacteria.p__Bacteroidota.c__Bacteroidia.o__Sphingobacteriales.f__AKYH767.g__AKYH767	0.65897			-
k__Bacteria.p__Proteobacteria.c__Alphaproteobacteria.o__Dongiales	1.88863			-
k__Bacteria.p__Acidobacteriota.c__Subgroup_11.o__Subgroup_11.f__Subgroup_11.g__Subgroup_11	0.56407			-
k__Bacteria.p__Firmicutes.c__Bacilli.o__Erysipelotrichales.f__Erysipelotrichaceae.g__Erysipelotrichaceae	2.0433			0.00885772
k__Bacteria.p__Acidobacteriota.c__Acidobacteriae.o__AKIW659.f__AKIW659	0.987603			-
k__Bacteria.p__Proteobacteria.c__Alphaproteobacteria.o__Rhizobiales.f__Xanthobacteraceae.g__Rhodoplanes	1.70823			-
k__Bacteria.p__Proteobacteria.c__Alphaproteobacteria.o__Caulobacterales.f__Caulobacteraceae.g__Brevundimonas	1.16619			-
k__Bacteria.p__Actinobacteriota.c__Actinobacteria.o__Propionibacteriales.f__Nocardioidaceae.g__Kribbella	1.26283			-
k__Bacteria.p__Firmicutes.c__Clostridia.o__Peptostreptococcales_Tissierellales.f__Peptostreptococcaceae.Other	0.912282			-
k__Bacteria.p__Myxococcota.c__Myxococcia.o__Myxococcales.f__Myxococcaceae	1.41462			-
k__Bacteria.p__Actinobacteriota.c__Actinobacteria.o__Bifidobacteriales.f__Bifidobacteriaceae	4.38901	FeSO4	4.12353	0.000177673
k__Bacteria.p__Firmicutes.c__Clostridia.Other.Other.Other	3.46042			0.0176822
k__Bacteria.p__Firmicutes.c__Bacilli.o__Erysipelotrichales.f__Erysipelotrichaceae.g__uncultured	2.96876			-
k__Bacteria.p__Proteobacteria.c__Gammaproteobacteria.o__Burkholderiales.f__Comamonadaceae.g__Ramlibacter	1.7994			-
k__Bacteria.p__Acidobacteriota.c__Blastocatellia.o__11_24.f__11_24.g__11_24	1.2609			-
k__Bacteria.p__Actinobacteriota.c__MB_A2_108.o__MB_A2_108.f__MB_A2_108.g__MB_A2_108	2.02857			0.000233733
k__Bacteria.p__Proteobacteria.c__Gammaproteobacteria.o__Burkholderiales.f__Gallionellaceae.Other	0.779615			0.0155079
k__Bacteria.p__Firmicutes.c__Clostridia.o__Lachnospirales.f__Lachnospiraceae.g__Lachnospiraceae_FCS020_group	3.1948			0.00163909
k__Bacteria.p__Latescibacterota	0.779982			-
k__Bacteria.p__Proteobacteria.c__Gammaproteobacteria.o__Ectothiorhodospirales	1.43668			0.000382307
k__Bacteria.p__Proteobacteria.c__Alphaproteobacteria.o__Rhizobiales.f__Beijerinckiaceae.Other	0.513927			-
k__Bacteria.p__Sva0485.c__Sva0485.o__Sva0485	1.60107			0.0198493
k__Bacteria.p__Firmicutes.c__Clostridia.o__Oscillospirales.f__Ruminococcaceae.g__Harryflintia	3.05642			0.00151001
k__Bacteria.p__Proteobacteria.c__Alphaproteobacteria.o__Azospirillales.f__Inquilinaceae.g__Inquilinus	0.967318			-
k__Bacteria.p__Actinobacteriota.c__Actinobacteria.o__Streptosporangiales.f__Thermomonosporaceae.Other	0.557252			-
k__Bacteria.p__Proteobacteria.c__Alphaproteobacteria.o__Paracaedibacterales.f__Paracaedibacteraceae.g__Candidatus_Finniella	0.90647			0.0337079
k__Bacteria.p__Nitrospirota.c__Thermodesulfovibrionia.o__uncultured.f__uncultured.g__uncultured	1.96195			-
k__Bacteria.p__Actinobacteriota.c__Acidimicrobiia.o__uncultured.f__uncultured.g__uncultured	0.476438			-
k__Bacteria.p__Deferribacterota.c__Deferribacteres.o__Deferribacterales	4.58674			-
k__Bacteria.p__Acidobacteriota.c__Acidobacteriae.o__Solibacterales.f__Solibacteraceae	2.35347			0.0206898
k__Bacteria.p__Proteobacteria.c__Gammaproteobacteria.o__Diplorickettsiales.f__Diplorickettsiaceae	1.36821			-
k__Bacteria.p__Myxococcota.c__Polyangia.o__Polyangiales	1.67021			-
k__Bacteria.p__Proteobacteria.c__Alphaproteobacteria.o__Caulobacterales.f__Hyphomonadaceae.g__Hyphomonas	0.978746			0.00302446
k__Bacteria.p__Actinobacteriota.c__Acidimicrobiia.o__Actinomarinales.f__uncultured	0.549117			-
k__Bacteria.p__Proteobacteria.Other.Other	2.47269			2.63e-05
k__Bacteria.p__Actinobacteriota.c__Acidimicrobiia.o__uncultured.f__uncultured	0.476438			-
k__Bacteria.p__Proteobacteria.c__Alphaproteobacteria.o__Rhodospirillales.f__Rhodospirillaceae.g__uncultured	1.16147			-
k__Bacteria.p__Proteobacteria.c__Gammaproteobacteria.o__Acidiferrobacterales.f__Acidiferrobacteraceae	0.779545			-
k__Bacteria.p__Proteobacteria.c__Alphaproteobacteria.Other.Other.Other	2.89105			0.00930096
k__Bacteria.p__Proteobacteria.c__Alphaproteobacteria.o__Sphingomonadales.f__Sphingomonadaceae.Other	1.46313			-
k__Bacteria.p__Deferribacterota	4.58674			-
k__Bacteria.p__Proteobacteria.c__Gammaproteobacteria.o__Burkholderiales.f__Nitrosomonadaceae.g__MND1	2.07992			-
k__Bacteria.p__Proteobacteria.c__Alphaproteobacteria.o__Rhizobiales.f__Pleomorphomonadaceae	1.05209			-
k__Bacteria.p__Desulfobacterota.c__Syntrophobacteria.o__Syntrophobacterales	1.29813			-
k__Bacteria.p__Acidobacteriota.c__Acidobacteriae.o__Acidobacteriales.f__Acidobacteriaceae__Subgroup_1_.g__uncultured	1.6734			-
k__Bacteria.p__Proteobacteria.c__Alphaproteobacteria.o__Sphingomonadales.f__Sphingomonadaceae.g__Novosphingobium	2.03499			-
k__Bacteria.p__Actinobacteriota.c__Thermoleophilia.o__Gaiellales.f__Gaiellaceae.g__Gaiella	2.21727			0.016442
k__Bacteria.p__Sva0485.c__Sva0485.o__Sva0485.f__Sva0485	1.60107			0.0198493
k__Bacteria.p__Acidobacteriota.c__Acidobacteriae.o__Acidobacteriales.f__Acidobacteriaceae__Subgroup_1_.g__Granulicella	0.759138			-
k__Bacteria.p__Proteobacteria.c__Alphaproteobacteria.o__Rhizobiales.f__A0839	1.15881			-
k__Bacteria.p__Acidobacteriota.c__Acidobacteriae.o__Subgroup_2.f__Subgroup_2	2.15566			0.0186963
k__Bacteria.p__NB1_j.c__NB1_j.o__NB1_j.f__NB1_j.g__NB1_j	1.04423			-
k__Bacteria.p__Firmicutes	5.53761	Model	4.79895	0.033163
k__Bacteria.p__Firmicutes.c__Clostridia.o__Oscillospirales.f___Clostridium__methylpentosum_group.g___Clostridium__methylpentosum_group	2.64629			9.44e-05
k__Bacteria.p__Proteobacteria.c__Gammaproteobacteria.o__KF_JG30_C25	1.0106			-
k__Bacteria.p__Proteobacteria.c__Gammaproteobacteria.o__Burkholderiales.f__TRA3_20	1.85936			-
k__Bacteria.p__Proteobacteria.c__Alphaproteobacteria.o__Rhizobiales.f__Pleomorphomonadaceae.g__Prosthecomicrobium	1.05209			-
k__Bacteria.p__Spirochaetota.c__Spirochaetia	0.630388			-
k__Bacteria.p__Zixibacteria.c__Zixibacteria.o__Zixibacteria	0.557255			-
k__Bacteria.p__Firmicutes.c__Bacilli.o__Acholeplasmatales	3.31369			0.00986675
k__Bacteria.p__Desulfobacterota.c__Desulfobacteria	1.03567			-
k__Bacteria.p__MBNT15.c__MBNT15.o__MBNT15.f__MBNT15.g__MBNT15	1.93892			0.00340288
k__Bacteria.p__Proteobacteria.c__Gammaproteobacteria.o__Alteromonadales.f__Alteromonadaceae	1.33252			-
k__Bacteria.p__Proteobacteria.Other.Other.Other.Other	2.47269			2.63e-05
k__Bacteria.p__Actinobacteriota.c__Actinobacteria	4.40197	FeSO4	4.12641	0.000114727
k__Bacteria.p__Actinobacteriota.c__Thermoleophilia.o__Gaiellales	2.68271			0.00022636
k__Bacteria.p__Actinobacteriota.c__Actinobacteria.o__Streptomycetales.f__Streptomycetaceae	2.54313			0.00104599
k__Bacteria.p__Actinobacteriota.c__Actinobacteria.o__Frankiales.f__Acidothermaceae.g__Acidothermus	1.59654			0.0337335
k__Bacteria.p__Acidobacteriota.c__Acidobacteriae.o__Bryobacterales.f__Bryobacteraceae	2.29253			0.0138781
k__Bacteria.p__Cyanobacteria.c__Cyanobacteriia.o__Phormidesmiales.f__Nodosilineaceae	0.493989			-
k__Bacteria.p__Proteobacteria.c__Gammaproteobacteria.o__Burkholderiales.f__Burkholderiaceae.g__Lautropia	1.81175			1.87e-05
k__Bacteria.p__Actinobacteriota.c__Actinobacteria.o__Propionibacteriales	1.57659			0.0391225
k__Bacteria.p__Actinobacteriota.c__Actinobacteria.o__Pseudonocardiales.f__Pseudonocardiaceae.g__Pseudonocardia	0.979322			-
k__Bacteria.p__Firmicutes.c__Clostridia.o__Lachnospirales.f__Lachnospiraceae.g___Eubacterium__oxidoreducens_group	2.40866			0.00291723
k__Bacteria.p__Bacteroidota.c__Bacteroidia.o__Cytophagales.f__Cytophagaceae	0.484981			-
k__Bacteria.p__Firmicutes.c__Bacilli.o__Lactobacillales.f__Enterococcaceae	2.14748			-
k__Bacteria.p__Bacteroidota.c__Bacteroidia.o__Bacteroidales.f__Dysgonomonadaceae.g__Dysgonomonas	1.21571			-
k__Bacteria.p__Proteobacteria.c__Alphaproteobacteria.o__Sphingomonadales.f__Sphingomonadaceae.g__Sphingopyxis	1.33092			-
k__Bacteria.p__Proteobacteria.c__Alphaproteobacteria.o__Rhodospirillales.f__uncultured	4.21552			9.85e-06
k__Bacteria.p__Verrucomicrobiota.c__Verrucomicrobiae.o__Pedosphaerales.f__Pedosphaeraceae.g__ADurb_Bin063_1	1.32176			0.0164003
k__Bacteria.p__Myxococcota.c__bacteriap25.o__bacteriap25.f__bacteriap25.g__bacteriap25	1.10525			-
k__Bacteria.p__Chloroflexi.c__Ktedonobacteria.o__C0119	0.875259			-
k__Bacteria.p__Gemmatimonadota.c__Gemmatimonadetes.o__Gemmatimonadales.f__Gemmatimonadaceae.g__Gemmatimonas	2.36704			-
k__Bacteria.p__Firmicutes.c__Clostridia.o__Oscillospirales.f__Ruminococcaceae.g__Ruminococcaceae	2.14159			2.04e-06
k__Bacteria.p__Chloroflexi.c__Ktedonobacteria	0.875259			-
k__Bacteria.p__Actinobacteriota.c__Actinobacteria.o__Pseudonocardiales	1.75807			-
k__Bacteria.p__Desulfobacterota.c__uncultured.o__uncultured.f__uncultured	1.54204			-
k__Bacteria.p__Proteobacteria.c__Alphaproteobacteria.o__Rhizobiales.f__Hyphomicrobiaceae.g__Filomicrobium	0.694103			-
k__Bacteria.p__Firmicutes.c__Bacilli.o__Erysipelotrichales.f__Erysipelatoclostridiaceae.g__Erysipelatoclostridiaceae	2.91777			0.00143161
k__Bacteria.p__Patescibacteria	1.55909			-
k__Bacteria.p__Actinobacteriota.c__Coriobacteriia.o__Coriobacteriales	3.85129			0.000525014
k__Bacteria.p__Actinobacteriota.c__Thermoleophilia.o__Gaiellales.f__uncultured	2.52973			0.00130766
k__Bacteria.p__Proteobacteria.c__Alphaproteobacteria.o__Elsterales.f__uncultured	1.9341			0.0360486
k__Bacteria.p__Firmicutes.c__Clostridia.o__Peptostreptococcales_Tissierellales.f__Peptostreptococcaceae	2.67445			0.0025874
k__Bacteria.p__Proteobacteria.c__Gammaproteobacteria.o__Alteromonadales	1.33252			-
k__Bacteria.p__Firmicutes.c__Clostridia.o__Eubacteriales	1.95805			0.000919321
k__Bacteria.p__Proteobacteria.c__Gammaproteobacteria.o__Burkholderiales.f__Comamonadaceae.g__Simplicispira	0.813062			-
k__Bacteria.p__Firmicutes.Other.Other.Other.Other	2.89163			2.96e-05
k__Bacteria.p__Desulfobacterota.c__Syntrophorhabdia.o__Syntrophorhabdales.f__Syntrophorhabdaceae	1.4326			-
k__Bacteria.p__Spirochaetota	0.630388			-
k__Bacteria.p__Proteobacteria.c__Gammaproteobacteria.o__Cellvibrionales.f__Cellvibrionaceae.g__Cellvibrio	1.57871			-
k__Bacteria.p__Acidobacteriota.c__Acidobacteriae.o__Subgroup_13.f__Subgroup_13	1.43711			-
k__Bacteria.p__Firmicutes.c__Clostridia.o__Christensenellales.f__Christensenellaceae.Other	2.39736			0.000196789
k__Bacteria.p__Proteobacteria.c__Alphaproteobacteria	4.27095			4.03e-05
k__Bacteria.p__Actinobacteriota.c__Actinobacteria.o__Frankiales.f__Frankiaceae	1.54182			0.00595706
k__Bacteria.p__Proteobacteria.c__Gammaproteobacteria.o__Burkholderiales.f__Nitrosomonadaceae.g__uncultured	0.545286			-
k__Bacteria.p__Proteobacteria.c__Gammaproteobacteria.Other.Other	0.807019			-
k__Bacteria.p__Firmicutes.c__Clostridia.o__Lachnospirales.f__Lachnospiraceae.Other	4.68737			-
k__Bacteria.p__Firmicutes.c__Clostridia.o__Clostridia_vadinBB60_group.f__Clostridia_vadinBB60_group	3.89742			0.00596376
k__Bacteria.p__Gemmatimonadota.c__Longimicrobia.o__Longimicrobiales.f__Longimicrobiaceae	0.807872			-
k__Bacteria.p__Proteobacteria.c__Alphaproteobacteria.o__uncultured	2.06614			-
k__Bacteria.p__Bacteroidota.c__Bacteroidia.o__Cytophagales.f__Microscillaceae.g__uncultured	1.1661			-
k__Bacteria.p__Latescibacterota.c__Latescibacterota	0.779982			-
k__Bacteria.p__Proteobacteria.c__Gammaproteobacteria.o__Burkholderiales.f__Alcaligenaceae.g__Achromobacter	0.687885			-
k__Bacteria.p__Actinobacteriota.c__Actinobacteria.o__Propionibacteriales.f__Nocardioidaceae.g__Aeromicrobium	0.810665			-
k__Bacteria.p__Proteobacteria.c__Alphaproteobacteria.o__Acetobacterales.f__Acetobacteraceae	1.46426			-
k__Bacteria.p__Actinobacteriota.c__Thermoleophilia	2.72644			0.000262994
k__Bacteria.p__Firmicutes.c__Bacilli.o__Bacillales.f__Bacillaceae	1.63157			-
k__Bacteria.p__Firmicutes.c__Clostridia.o__Oscillospirales.f__Oscillospiraceae.g__Intestinimonas	3.40784			0.00296902
k__Bacteria.p__MBNT15.c__MBNT15.o__MBNT15	1.93892			0.00340288
k__Bacteria.p__Proteobacteria.c__Alphaproteobacteria.o__Rhizobiales.f__Beijerinckiaceae.g__Methylocystis	1.16078			-
k__Bacteria.p__Proteobacteria.c__Alphaproteobacteria.o__Rhodospirillales.f__Rhodospirillaceae	1.16147			-
k__Bacteria.p__Desulfobacterota.c__Desulfovibrionia.o__Desulfovibrionales.Other.Other	1.79265			-
k__Bacteria.p__Actinobacteriota.c__Actinobacteria.o__Pseudonocardiales.f__Pseudonocardiaceae.g__Actinophytocola	1.32477			-
k__Bacteria.p__Firmicutes.c__Clostridia.o__Oscillospirales.f__Butyricicoccaceae.g__Butyricicoccus	2.49274			0.0114455
k__Bacteria.p__Firmicutes.c__Clostridia.o__Monoglobales.f__Monoglobaceae	2.52165			6.41e-06
k__Bacteria.p__Firmicutes.c__Clostridia.o__Clostridiales	2.93745			0.0281957
k__Bacteria.p__Sva0485	1.60107			0.0198493
k__Bacteria.p__Firmicutes.c__Clostridia.o__Monoglobales	2.52165			6.41e-06
k__Bacteria.p__Myxococcota	2.21322			-
k__Bacteria.p__Firmicutes.c__Bacilli.o__RF39.f__RF39	2.82362			0.000276861
k__Bacteria.p__Myxococcota.c__Myxococcia.o__Myxococcales.f__Anaeromyxobacteraceae	0.484981			-
k__Bacteria.p__Actinobacteriota.c__Acidimicrobiia.o__Microtrichales.f__uncultured	1.73498			-
k__Bacteria.p__Latescibacterota.c__Latescibacterota.o__Latescibacterota.f__Latescibacterota.g__Latescibacterota	0.779982			-
k__Bacteria.p__Verrucomicrobiota.c__Verrucomicrobiae.o__Pedosphaerales	1.59281			0.0181011
k__Bacteria.p__Acidobacteriota.c__Subgroup_11.o__Subgroup_11.f__Subgroup_11	0.56407			-
k__Bacteria.p__Desulfobacterota.c__Desulfobaccia.o__Desulfobaccales.f__Desulfobaccaceae	1.43141			-
k__Bacteria.p__Desulfobacterota.c__Desulfuromonadia.o__Geobacterales.f__Geobacteraceae.g__Geobacteraceae	1.0807			-
k__Bacteria.p__Proteobacteria.c__Gammaproteobacteria.o__Xanthomonadales	2.51799			-
k__Bacteria.p__Actinobacteriota.c__Actinobacteria.o__Micromonosporales.f__Micromonosporaceae.g__Actinoplanes	1.21653			-
k__Bacteria.p__Desulfobacterota.c__Desulfovibrionia.o__Desulfovibrionales.f__Desulfovibrionaceae	4.55021	Lowdose	4.10233	0.0405721
k__Bacteria.p__Bacteroidota.c__SJA_28	1.59907			0.0342574
k__Bacteria.p__Firmicutes.c__Bacilli.o__Lactobacillales.f__Streptococcaceae.g__Lactococcus	1.30217			-
k__Bacteria.p__Zixibacteria.c__Zixibacteria.o__Zixibacteria.f__Zixibacteria	0.557255			-
k__Bacteria.p__Actinobacteriota.c__Actinobacteria.o__Pseudonocardiales.f__Pseudonocardiaceae.g__Umezawaea	1.16265			-
k__Bacteria.p__Gemmatimonadota.c__BD2_11_terrestrial_group.o__BD2_11_terrestrial_group.f__BD2_11_terrestrial_group	0.660155			-
k__Bacteria.p__Firmicutes.c__Clostridia.o__Clostridia_vadinBB60_group	3.89742			0.00596376
k__Bacteria.p__Cyanobacteria.c__Vampirivibrionia.o__Gastranaerophilales.f__Gastranaerophilales	0.745159			-
k__Bacteria.p__Proteobacteria.c__Gammaproteobacteria.o__Enterobacterales.f__Morganellaceae.g__Proteus	3.89898			0.00016474
k__Bacteria.p__Proteobacteria.c__Gammaproteobacteria.o__Enterobacterales.f__Morganellaceae.g__Morganella	2.036			-
k__Bacteria.p__Proteobacteria.c__Alphaproteobacteria.o__Rhizobiales.f__Rhizobiales_Incertae_Sedis.g__Nordella	1.45576			-
k__Bacteria.p__Proteobacteria.c__Gammaproteobacteria.o__Xanthomonadales.f__Rhodanobacteraceae.g__Ahniella	0.881007			-
k__Bacteria.p__Proteobacteria.c__Gammaproteobacteria.o__Xanthomonadales.f__Rhodanobacteraceae.g__Rhodanobacter	2.23121			-
k__Bacteria.p__Actinobacteriota.c__Actinobacteria.o__Frankiales	2.22962			0.0022861
k__Bacteria.p__Firmicutes.c__Clostridia.o__Christensenellales.f__Christensenellaceae.g__Christensenellaceae	0.557255			-
k__Bacteria.p__Bacteroidota.c__Bacteroidia.o__Bacteroidales.f__Prevotellaceae.g__Alloprevotella	3.79199			9.02e-05
k__Bacteria.p__Acidobacteriota.c__Acidobacteriae.o__Acidobacteriales.f__Acidobacteriaceae__Subgroup_1_.g__Edaphobacter	1.48603			-
k__Bacteria.p__Firmicutes.c__Clostridia.o__Peptostreptococcales_Tissierellales.f__Anaerovoracaceae.g___Eubacterium__nodatum_group	2.65762			0.000178809
k__Bacteria.p__Proteobacteria.c__Alphaproteobacteria.o__Rhizobiales.f__C2U.g__C2U	0.819042			-
k__Bacteria.p__Desulfobacterota.c__Desulfuromonadia.o__Geobacterales.f__Geobacteraceae	1.96525			0.0391912
k__Bacteria.p__Actinobacteriota.c__Actinobacteria.o__Micromonosporales.f__Micromonosporaceae.g__Luedemannella	1.17736			-
k__Bacteria.p__Proteobacteria.c__Gammaproteobacteria.o__Cellvibrionales.f__Cellvibrionaceae	1.57871			-
k__Bacteria.p__Proteobacteria.c__Alphaproteobacteria.o__Rhizobiales.f__Xanthobacteraceae.Other	1.83016			0.031324
k__Bacteria.p__Acidobacteriota.c__Subgroup_22.o__Subgroup_22.f__Subgroup_22.g__Subgroup_22	1.0823			-
k__Bacteria.p__Nitrospirota.c__4_29_1.o__4_29_1.f__4_29_1.g__4_29_1	1.98409			0.000691294
k__Bacteria.p__Proteobacteria.c__Alphaproteobacteria.o__Kiloniellales.f__Kiloniellaceae	1.06208			-
k__Bacteria.p__Firmicutes.c__Clostridia.o__Oscillospirales.f__Ruminococcaceae.g__uncultured	3.71079			-
k__Bacteria.p__Proteobacteria.c__Alphaproteobacteria.o__Rhizobiales.f__uncultured	1.19554			-
k__Bacteria.p__Firmicutes.c__Clostridia.o__Peptostreptococcales_Tissierellales.f__Anaerovoracaceae.g__Family_XIII_AD3011_group	2.40854			0.02012
k__Bacteria.p__Bacteroidota.c__Kryptonia.o__Kryptoniales.f__BSV26	1.57623			0.0203872
k__Bacteria.p__Chloroflexi.c__Anaerolineae.o__Anaerolineae	1.45837			-
k__Bacteria.p__Acidobacteriota.c__Acidobacteriae.o__GOUTB8.f__GOUTB8	1.35385			0.00672013
k__Bacteria.p__Actinobacteriota.c__Acidimicrobiia	2.60405			-
k__Bacteria.p__Proteobacteria.c__Alphaproteobacteria.o__Rhizobiales.f__Rhizobiales_Incertae_Sedis	1.95769			0.038969
k__Bacteria.p__Proteobacteria.c__Alphaproteobacteria.o__Micropepsales.f__Micropepsaceae.g__Micropepsis	1.21003			0.0201077
k__Bacteria.p__Myxococcota.c__Polyangia.o__Polyangiales.f__Sandaracinaceae.g__uncultured	0.68667			-
k__Bacteria.p__Actinobacteriota.c__Rubrobacteria	1.04875			-
k__Bacteria.p__Proteobacteria.c__Gammaproteobacteria.o__Xanthomonadales.f__Xanthomonadaceae.g__Arenimonas	1.57334			-
k__Bacteria.p__Actinobacteriota.c__Actinobacteria.o__Bifidobacteriales	4.38901	FeSO4	4.12353	0.000177673
k__Bacteria.p__Chloroflexi.c__Ktedonobacteria.o__C0119.f__C0119	0.875259			-
k__Bacteria.p__Myxococcota.c__Polyangia.o__Blfdi19.f__Blfdi19	0.506198			-
k__Bacteria.p__Bacteroidota.c__Bacteroidia.o__Flavobacteriales	2.78639			0.00136786
k__Bacteria.p__Firmicutes.c__Clostridia.o__Peptostreptococcales_Tissierellales.f__Anaerovoracaceae.g__Family_XIII_UCG_001	1.81321			0.00154964
k__Bacteria.p__Acidobacteriota.c__Subgroup_11.o__Subgroup_11	0.56407			-
k__Bacteria.p__Firmicutes.c__Bacilli.o__Lactobacillales	4.249			0.017098
k__Bacteria.p__Proteobacteria.c__Gammaproteobacteria.o__Burkholderiales.f__Comamonadaceae.g__Ideonella	1.2022			0.0406117
k__Bacteria.p__Proteobacteria.c__Alphaproteobacteria.o__Rhodospirillales.f__Magnetospiraceae	0.742445			-
k__Bacteria.p__Proteobacteria.c__Gammaproteobacteria.o__Salinisphaerales	0.676881			-
k__Bacteria.p__Actinobacteriota.c__Thermoleophilia.o__Solirubrobacterales.f__67_14	1.51924			0.0056687
k__Bacteria.p__Proteobacteria.c__Gammaproteobacteria.o__Pseudomonadales.f__Moraxellaceae.g__Enhydrobacter	0.928068			-
k__Bacteria.p__Elusimicrobiota.c__Elusimicrobia	0.506173			-
k__Bacteria.p__Firmicutes.c__Bacilli.o__Erysipelotrichales.f__Erysipelotrichaceae	5.05589	Model	4.74759	6.2e-06
k__Bacteria.p__Bacteroidota.c__Bacteroidia.o__Bacteroidales.f__Tannerellaceae.g__Macellibacteroides	1.51801			-
k__Bacteria.p__Acidobacteriota.c__Acidobacteriae.Other	0.866573			-
k__Bacteria.p__Patescibacteria.c__Saccharimonadia.o__Saccharimonadales.f__Saccharimonadaceae.g__Candidatus_Saccharimonas	1.48767			0.0295224
k__Bacteria.p__Firmicutes.c__Clostridia.o__uncultured.f__uncultured.g__uncultured	1.11297			-
k__Bacteria.p__Desulfobacterota.c__Syntrophobacteria	1.29813			-
k__Bacteria.p__Acidobacteriota.c__Acidobacteriae.o__Acidobacteriales.f__Koribacteraceae.g__Candidatus_Koribacter	2.0844			-
k__Bacteria.p__Proteobacteria.c__Gammaproteobacteria.o__Salinisphaerales.f__Solimonadaceae	0.676881			-
k__Bacteria.p__Acidobacteriota.c__Acidobacteriae.o__Acidobacteriales.Other	1.80337			-
k__Bacteria.p__Proteobacteria.c__Alphaproteobacteria.o__Azospirillales.f__uncultured.g__uncultured	0.94701			-
k__Bacteria.p__Firmicutes.c__Clostridia.o__Eubacteriales.f__Anaerofustaceae	1.95805			0.000919321
k__Bacteria.p__Desulfobacterota.c__Desulfovibrionia.o__Desulfovibrionales.Other	1.79265			-
k__Bacteria.p__Proteobacteria.c__Gammaproteobacteria.o__Burkholderiales.f__Chromobacteriaceae	0.500481			-
k__Bacteria.p__Bacteroidota.c__Bacteroidia.o__Flavobacteriales.f__Flavobacteriaceae.g__Mariniflexile	1.7355			-
k__Bacteria.p__Myxococcota.c__Polyangia.o__Polyangiales.f__BIrii41.g__BIrii41	1.41003			-
k__Bacteria.p__Proteobacteria.c__Gammaproteobacteria.o__Burkholderiales.f__TRA3_20.g__TRA3_20	1.85936			-
k__Bacteria.p__Gemmatimonadota.c__S0134_terrestrial_group.o__S0134_terrestrial_group	1.52409			-
k__Bacteria.p__Proteobacteria.c__Gammaproteobacteria.o__Acidiferrobacterales.f__Acidiferrobacteraceae.g__Sulfurifustis	0.779545			-
k__Bacteria.p__Acidobacteriota.c__Acidobacteriae.o__Acidobacteriales.f__Acidobacteriaceae__Subgroup_1_	2.29107			0.0252221
k__Bacteria.p__Gemmatimonadota.c__AKAU4049	1.17122			-
k__Bacteria.p__Acidobacteriota.c__Holophagae.o__Subgroup_7.f__Subgroup_7.g__Subgroup_7	1.72494			0.0232462
k__Bacteria.p__Acidobacteriota.c__Acidobacteriae.o__Subgroup_12.f__Subgroup_12	0.848756			-
k__Bacteria.p__Proteobacteria.c__Alphaproteobacteria.o__Rhodobacterales	1.87324			7.41e-05
k__Bacteria.p__Bacteroidota.c__Bacteroidia.o__Bacteroidales.f__Rikenellaceae.g__Rikenellaceae	2.82369			0.000143568
k__Bacteria.p__Patescibacteria.c__Saccharimonadia.o__Saccharimonadales.f__Saccharimonadaceae	1.48767			0.0295224
k__Bacteria.p__Myxococcota.c__Polyangia.o__Haliangiales.f__Haliangiaceae	1.97383			-
k__Bacteria.p__Patescibacteria.c__Saccharimonadia.o__Saccharimonadales.f__LWQ8	0.915952			-
k__Bacteria.p__Cyanobacteria.c__Cyanobacteriia.o__Phormidesmiales	0.493989			-
k__Bacteria.p__Campilobacterota	4.91918	Control	4.55202	0.00693383
k__Bacteria.p__Firmicutes.c__Clostridia.o__Oscillospirales.f__Ruminococcaceae.g__Incertae_Sedis	3.49097			0.000821693
k__Bacteria.p__Firmicutes.c__Clostridia.o__Peptostreptococcales_Tissierellales.f__Anaerovoracaceae	3.06085			0.00640088
k__Bacteria.p__Actinobacteriota.c__Actinobacteria.o__Streptosporangiales.f__Thermomonosporaceae	1.77886			0.0151214
k__Bacteria.Other.Other	3.54351			0.010607
k__Bacteria.p__Firmicutes.c__Bacilli.o__Erysipelotrichales.Other	2.94998			3.17e-05
k__Bacteria.p__Deferribacterota.c__Deferribacteres	4.58674			-
k__Bacteria.p__Actinobacteriota.c__Actinobacteria.o__Micromonosporales.f__Micromonosporaceae.g__Dactylosporangium	1.57629			-
k__Bacteria.p__Actinobacteriota.c__Coriobacteriia.o__Coriobacteriales.f__Eggerthellaceae	3.7275			0.00138252
k__Bacteria.p__Proteobacteria.c__Alphaproteobacteria.o__Reyranellales	1.88004			-
k__Bacteria.p__Bacteroidota.c__Bacteroidia.o__Bacteroidales.f__Tannerellaceae	4.81899	Highdose	4.46278	1.12e-06
k__Bacteria.p__Bacteroidota.c__Bacteroidia.o__Chitinophagales.f__Saprospiraceae.g__uncultured	1.53169			0.0419824
k__Bacteria.p__Actinobacteriota.c__Thermoleophilia.o__Solirubrobacterales	1.70782			0.00636451
k__Bacteria.p__Myxococcota.c__Myxococcia.o__Myxococcales	1.41462			-
k__Bacteria.p__Bacteroidota.c__Bacteroidia.o__Flavobacteriales.f__Crocinitomicaceae.g__Fluviicola	0.819042			-
k__Bacteria.p__Actinobacteriota.c__Coriobacteriia	3.85129			0.000525014
k__Bacteria.p__Proteobacteria.c__Alphaproteobacteria.Other	2.89105			0.00930096
k__Bacteria.p__RCP2_54.c__RCP2_54.o__RCP2_54	1.9273			-
k__Bacteria.p__Proteobacteria.c__Alphaproteobacteria.o__Rhizobiales.f__Methyloligellaceae.g__uncultured	1.71109			0.00174971
k__Bacteria.p__Proteobacteria.c__Alphaproteobacteria.o__Kiloniellales	1.06208			-
k__Bacteria.p__Proteobacteria.c__Gammaproteobacteria.o__Xanthomonadales.f__Rhodanobacteraceae.g__Tahibacter	0.258155			-
k__Bacteria.p__Proteobacteria.c__Alphaproteobacteria.o__Rhizobiales.f__A0839.g__A0839	1.15881			-
k__Bacteria.p__Actinobacteriota.c__Acidimicrobiia.o__Microtrichales	2.52391			0.0136215
k__Bacteria.p__Proteobacteria.c__Gammaproteobacteria.o__Burkholderiales	4.97867	Model	4.6787	4.35e-06
k__Bacteria.p__Proteobacteria.c__Gammaproteobacteria.o__Burkholderiales.f__A21b.g__A21b	2.04822			-
k__Bacteria.p__Firmicutes.Other	2.89163			2.96e-05
k__Bacteria.p__Firmicutes.c__Bacilli.o__Erysipelotrichales.f__Erysipelotrichaceae.g___Clostridium__innocuum_group	3.5632			9.57e-08
k__Bacteria.p__Firmicutes.c__Bacilli.o__Bacillales	1.63157			-
k__Bacteria.p__Bacteroidota.c__Bacteroidia.o__Cytophagales.f__Microscillaceae.g__Ohtaekwangia	1.06244			-
k__Bacteria.p__Firmicutes.c__Bacilli.o__Erysipelotrichales.f__Erysipelatoclostridiaceae.g__Erysipelatoclostridium	4.41443	Model	4.08865	2.34e-06
k__Bacteria.p__Proteobacteria.c__Gammaproteobacteria.o__KI89A_clade	0.678098			-
k__Bacteria.p__RCP2_54	1.9273			-
k__Bacteria.p__Proteobacteria.c__Gammaproteobacteria.o__Xanthomonadales.f__Rhodanobacteraceae.g__Dyella	1.44468			0.0344222
k__Bacteria.p__Firmicutes.c__Clostridia.o__Oscillospirales.f__Butyricicoccaceae.Other	1.27546			0.0437648
k__Bacteria.p__Proteobacteria.c__Gammaproteobacteria.o__Enterobacterales	4.4716			-
k__Bacteria.p__Proteobacteria.c__Alphaproteobacteria.o__Dongiales.f__Dongiaceae	1.88863			-
k__Bacteria.p__Actinobacteriota.c__Coriobacteriia.o__Coriobacteriales.f__Eggerthellaceae.g__Enterorhabdus	3.72555			0.00111115
k__Bacteria.p__Proteobacteria.c__Gammaproteobacteria.o__EPR3968_O8a_Bc78	0.995133			-
k__Bacteria.p__Cyanobacteria.c__Vampirivibrionia	0.745159			-
k__Bacteria.p__Proteobacteria.c__Gammaproteobacteria.o__Burkholderiales.f__Comamonadaceae.g__uncultured	1.11362			0.0353982
k__Bacteria.p__Cyanobacteria.c__Vampirivibrionia.o__Gastranaerophilales.f__Gastranaerophilales.g__Gastranaerophilales	0.745159			-
k__Bacteria.p__Actinobacteriota.c__Thermoleophilia.o__Gaiellales.f__Gaiellaceae	2.21727			0.016442
k__Bacteria.p__Firmicutes.c__Clostridia.o__Lachnospirales.f__Lachnospiraceae.g__Lachnospiraceae_UCG_006	3.19928			8.03e-05
k__Bacteria.p__Firmicutes.c__Clostridia.o__Peptococcales	2.88053			0.000143753
k__Bacteria.p__Firmicutes.c__Clostridia.o__Lachnospirales.f__Lachnospiraceae.g__Lachnospiraceae_UCG_004	0.687169			-
k__Bacteria.p__Proteobacteria.c__Gammaproteobacteria.o__PLTA13.f__PLTA13	1.36104			-
k__Bacteria.p__Actinobacteriota.c__Actinobacteria.o__Frankiales.f__Geodermatophilaceae.g__Blastococcus	1.291			-
k__Bacteria.p__Firmicutes.c__Clostridia.o__Lachnospirales.f__Lachnospiraceae.g__Lachnospiraceae_UCG_001	3.55401			1.64e-05
k__Bacteria.p__Bacteroidota.c__Bacteroidia.o__Bacteroidales.f__Prevotellaceae.g__Prevotellaceae_UCG_001	4.39425	Control	4.08734	0.000202984
k__Bacteria.p__Firmicutes.c__Bacilli.o__Erysipelotrichales.f__Erysipelotrichaceae.g__Ileibacterium	4.76918	FeSO4	4.49205	7.31e-05
k__Bacteria.p__Cyanobacteria.c__Cyanobacteriia.o__Phormidesmiales.f__Nodosilineaceae.g__Nodosilinea_PCC_7104	0.493989			-
k__Bacteria.p__Proteobacteria.c__Gammaproteobacteria.o__Gammaproteobacteria_Incertae_Sedis.f__Unknown_Family	2.02195			-
k__Bacteria.p__Gemmatimonadota.c__S0134_terrestrial_group	1.52409			-
k__Bacteria.p__Proteobacteria.c__Gammaproteobacteria.o__Enterobacterales.f__Thorselliaceae.g__Thorsellia	0.961272			-
k__Bacteria.p__Firmicutes.c__Bacilli	5.20256	Model	4.8501	9.6e-06
k__Bacteria.p__Gemmatimonadota.c__Gemmatimonadetes.o__Gemmatimonadales.f__Gemmatimonadaceae.g__Roseisolibacter	1.48778			-
k__Bacteria.p__Proteobacteria.c__Gammaproteobacteria.o__Burkholderiales.f__Comamonadaceae.g__Hydrogenophaga	0.694103			-
k__Bacteria.p__Deferribacterota.c__Deferribacteres.o__Deferribacterales.f__Deferribacteraceae	4.58674			-
k__Bacteria.p__Gemmatimonadota.c__S0134_terrestrial_group.o__S0134_terrestrial_group.f__S0134_terrestrial_group.g__S0134_terrestrial_group	1.52409			-
k__Bacteria.p__Proteobacteria.c__Alphaproteobacteria.o__Rhizobiales.f__Amb_16S_1323.g__Amb_16S_1323	1.17122			-
k__Bacteria.p__Proteobacteria.c__Gammaproteobacteria.o__Pseudomonadales.f__Pseudomonadaceae.g__Pseudomonas	2.0486			-
k__Bacteria.p__Chloroflexi	1.72402			-
k__Bacteria.p__Myxococcota.c__bacteriap25.o__bacteriap25.f__bacteriap25	1.10525			-
k__Bacteria.p__Proteobacteria.c__Gammaproteobacteria.o__Burkholderiales.f__Rhodocyclaceae.Other	1.47659			-
k__Bacteria.p__Bacteroidota.c__Bacteroidia.o__Bacteroidales.f__Rikenellaceae.Other	3.04259			0.0184669
k__Bacteria.p__Nitrospirota.c__4_29_1.o__4_29_1.f__4_29_1	1.98409			0.000691294
k__Bacteria.p__Proteobacteria.c__Alphaproteobacteria.o__Azospirillales.f__uncultured	0.94701			-
k__Bacteria.p__Firmicutes.c__Clostridia.o__Oscillospirales.f__Oscillospiraceae.g__UCG_005	2.29988			0.000282784
k__Bacteria.p__Bacteroidota.c__Bacteroidia.Other	1.83683			0.000106131
k__Bacteria.p__Firmicutes.c__Clostridia.o__Oscillospirales.f__Oscillospiraceae.g__UCG_007	1.72269			3.23e-05
k__Bacteria.p__Proteobacteria.c__Gammaproteobacteria.o__Burkholderiales.f__Sutterellaceae.g__Parasutterella	4.97428	Model	4.67953	3.93e-06
k__Bacteria.p__Nitrospirota.c__4_29_1	1.98409			0.000691294
k__Bacteria.p__Acidobacteriota.c__Holophagae.o__Holophagales	0.974628			-
k__Bacteria.p__Firmicutes.c__Clostridia.o__Oscillospirales.f__Oscillospiraceae.g__UCG_003	2.41429			0.000461287
k__Bacteria.p__Bacteroidota.c__Bacteroidia.o__Bacteroidales.f__Tannerellaceae.Other	3.39948			1.52e-06
k__Bacteria.p__Proteobacteria.c__Gammaproteobacteria.o__Burkholderiales.f__Comamonadaceae	2.58974			0.00776326
k__Bacteria.p__Verrucomicrobiota.c__Verrucomicrobiae.o__Pedosphaerales.f__Pedosphaeraceae.g__Pedosphaeraceae	0.632616			-
k__Bacteria.p__Proteobacteria.c__Alphaproteobacteria.o__Rhodospirillales.f__uncultured.g__uncultured	4.21552			9.85e-06
k__Bacteria.p__Bacteroidota.c__Bacteroidia.o__Chitinophagales.f__Chitinophagaceae.g__Sediminibacterium	0.762609			-
k__Bacteria.p__Actinobacteriota.c__Actinobacteria.o__Streptosporangiales.f__Thermomonosporaceae.g__Actinoallomurus	1.75674			0.000760532
k__Bacteria.p__Patescibacteria.c__Parcubacteria.o__Candidatus_Jorgensenbacteria	0.449344			-
k__Bacteria.p__Firmicutes.c__Clostridia.o__Lachnospirales.f__Lachnospiraceae.g__Tuzzerella	3.87463			6.95e-05
k__Bacteria.p__Actinobacteriota.c__Acidimicrobiia.o__Actinomarinales	0.549117			-
k__Bacteria.p__Proteobacteria.c__Gammaproteobacteria.o__Burkholderiales.f__A21b	2.04822			-
k__Bacteria.p__Firmicutes.c__Bacilli.o__Erysipelotrichales.f__Erysipelotrichaceae.g__Faecalibaculum	4.80656	Model	4.51456	2.42e-05
k__Bacteria.p__Proteobacteria.c__Gammaproteobacteria.o__Xanthomonadales.f__Xanthomonadaceae	2.00058			-
k__Bacteria.p__Firmicutes.c__Clostridia.o__Oscillospirales.f__Butyricicoccaceae	3.0486			0.000224374
k__Bacteria.p__Firmicutes.c__Clostridia	5.47472			-
k__Bacteria.p__Firmicutes.c__Bacilli.o__Acholeplasmatales.f__Acholeplasmataceae	3.31369			0.00986675
k__Bacteria.p__Bacteroidota.c__Bacteroidia.o__Chitinophagales.f__Chitinophagaceae.g__Parafilimonas	1.13053			-
k__Bacteria.p__Proteobacteria.c__Gammaproteobacteria.o__Burkholderiales.f__Methylophilaceae.g__Candidatus_Methylopumilus	0.977277			0.00362869
k__Bacteria.p__Proteobacteria.c__Alphaproteobacteria.o__Elsterales.f__URHD0088.g__URHD0088	1.23571			0.049202
k__Bacteria.p__Firmicutes.c__Bacilli.o__Lactobacillales.f__Streptococcaceae.g__Streptococcus	1.88237			0.00908469
k__Bacteria.p__Fibrobacterota.c__Fibrobacteria	0.213837			-
k__Bacteria.p__Nitrospirota.c__Nitrospiria	2.13353			-
k__Bacteria.p__Proteobacteria.c__Gammaproteobacteria.o__R7C24.f__R7C24	1.25502			0.0212546
k__Bacteria.p__Campilobacterota.c__Campylobacteria.o__Campylobacterales.f__Arcobacteraceae.g__Arcobacter	0.679179			0.047163
k__Bacteria.p__Proteobacteria.c__Gammaproteobacteria.o__Burkholderiales.f__Hydrogenophilaceae	0.80792			-
k__Bacteria.p__Actinobacteriota.c__Actinobacteria.o__Micrococcales.f__Micrococcaceae.g__Rothia	0.685053			-
k__Bacteria.p__Actinobacteriota.c__Actinobacteria.o__Streptomycetales	2.54313			0.00104599
k__Bacteria.p__Actinobacteriota.c__Actinobacteria.Other	0.505076			-
k__Bacteria.p__Bacteroidota.c__Bacteroidia.o__Chitinophagales.f__uncultured.g__uncultured	0.857731			-
k__Bacteria.p__Zixibacteria	0.557255			-
k__Bacteria.p__Nitrospirota.c__Nitrospiria.o__Nitrospirales.f__Nitrospiraceae.g__Nitrospira	2.13353			-
k__Bacteria.p__Proteobacteria.c__Alphaproteobacteria.o__Elsterales.f__uncultured.g__uncultured	1.9341			0.0360486
k__Bacteria.p__Myxococcota.c__Polyangia.o__Haliangiales.f__Haliangiaceae.g__Haliangium	1.97383			-
k__Bacteria.p__Actinobacteriota.c__MB_A2_108.o__MB_A2_108.f__MB_A2_108	2.02857			0.000233733
k__Bacteria.p__Actinobacteriota.c__Actinobacteria.o__Micromonosporales.f__Micromonosporaceae.g__Micromonospora	1.60251			-
k__Bacteria.p__Firmicutes.c__Clostridia.o__Oscillospirales.f__uncultured.g__uncultured	1.36755			0.000301986
k__Bacteria.p__Proteobacteria.c__Alphaproteobacteria.o__Rickettsiales.f__Rickettsiaceae.Other	0.507735			-
k__Bacteria.p__Proteobacteria.c__Gammaproteobacteria.o__Burkholderiales.f__Rhodocyclaceae.g__Azoarcus	1.06045			-
k__Bacteria.p__Acidobacteriota.c__Acidobacteriae.o__Acidobacteriales	3.07681			0.00112551
k__Bacteria.p__Firmicutes.c__Clostridia.o__Lachnospirales.f__Lachnospiraceae.g__Lachnoclostridium	3.88457			0.0220844
k__Bacteria.p__Proteobacteria.c__Gammaproteobacteria.o__Burkholderiales.f__Comamonadaceae.g__Rhodoferax	0.909852			-
k__Bacteria.p__Acidobacteriota.c__Acidobacteriae.o__Acidobacteriales.f__Acidobacteriales.g__Acidobacteriales	1.51581			-
k__Bacteria.p__Chloroflexi.c__Anaerolineae.o__Anaerolineae.f__Anaerolineae	1.45837			-
k__Bacteria.p__Acidobacteriota.c__Acidobacteriae.o__PAUC26f.f__PAUC26f	1.05525			-
k__Bacteria.p__Proteobacteria.c__Gammaproteobacteria	4.98289	Model	4.6775	7.69e-06
k__Bacteria.p__Firmicutes.c__Clostridia.o__Clostridiales.f__Clostridiaceae.g__Clostridium_sensu_stricto_1	2.92261			0.018126
k__Bacteria.p__Desulfobacterota.c__Desulfovibrionia.o__Desulfovibrionales.f__Desulfovibrionaceae.g__uncultured	4.46309			-
k__Bacteria.p__Cyanobacteria.c__Cyanobacteriia.Other.Other	0.685198			-
k__Bacteria.p__Acidobacteriota.c__Acidobacteriae.o__Acidobacteriales.f__Acidobacteriaceae__Subgroup_1_.g__Occallatibacter	1.38284			0.002544
k__Bacteria.p__Firmicutes.c__Clostridia.o__Oscillospirales.f__Ruminococcaceae.Other	3.52971			0.000133651
k__Bacteria.p__Elusimicrobiota.c__Elusimicrobia.o__MVP_88.f__MVP_88	0.506173			-
k__Bacteria.p__Desulfobacterota.c__Desulfovibrionia.o__Desulfovibrionales.f__Desulfovibrionaceae.g__Desulfovibrio	3.56226			0.000852638
k__Bacteria.p__Proteobacteria.c__Alphaproteobacteria.o__Rhizobiales.f__Xanthobacteraceae.g__Pseudolabrys	1.57066			-
k__Bacteria.p__Bacteroidota.c__Bacteroidia.o__Cytophagales.f__Microscillaceae.Other	1.10414			-
k__Bacteria.p__Proteobacteria.c__Alphaproteobacteria.o__Micropepsales.f__Micropepsaceae.g__Micropepsaceae	0.481052			-
k__Bacteria.p__Proteobacteria.c__Gammaproteobacteria.o__Pseudomonadales.f__Pseudomonadaceae	2.0486			-
k__Bacteria.p__Proteobacteria.c__Gammaproteobacteria.o__Burkholderiales.f__Alcaligenaceae.g__Castellaniella	0.956999			-
k__Bacteria.p__Acidobacteriota.c__Acidobacteriae.o__Bryobacterales.f__Bryobacteraceae.g__Bryobacter	2.29253			0.0138781
k__Bacteria.p__Proteobacteria.c__Gammaproteobacteria.o__Burkholderiales.f__Alcaligenaceae.g__GKS98_freshwater_group	0.982304			0.0336062
k__Bacteria.p__Sva0485.c__Sva0485	1.60107			0.0198493
k__Bacteria.p__Actinobacteriota.c__Acidimicrobiia.o__Microtrichales.f__Ilumatobacteraceae.g__CL500_29_marine_group	2.47961			0.00282451
k__Bacteria.p__Bacteroidota.c__Bacteroidia.o__Bacteroidales.f__Marinifilaceae.g__Odoribacter	4.48117	Control	4.0392	0.00439139
k__Bacteria.p__Proteobacteria.c__Gammaproteobacteria.o__Pasteurellales.f__Pasteurellaceae	0.915952			-
k__Bacteria.p__Proteobacteria.c__Gammaproteobacteria.o__JTB23	0.518012			-
k__Bacteria.p__Verrucomicrobiota.c__Verrucomicrobiae	2.10591			-
k__Bacteria.p__Proteobacteria.c__Alphaproteobacteria.o__Dongiales.f__Dongiaceae.g__Dongia	1.88863			-
k__Bacteria.p__Desulfobacterota.c__uncultured.o__uncultured.f__uncultured.g__uncultured	1.54204			-
k__Bacteria.p__Patescibacteria.c__Parcubacteria.o__Candidatus_Jorgensenbacteria.f__Candidatus_Jorgensenbacteria	0.449344			-
k__Bacteria.p__Firmicutes.c__Clostridia.o__Peptostreptococcales_Tissierellales.f__Anaerovoracaceae.Other	1.36021			-
k__Bacteria.p__Acidobacteriota.c__Acidobacteriae.o__Acidobacteriales.Other.Other	1.80337			-
k__Bacteria.p__Proteobacteria.c__Alphaproteobacteria.o__Sphingomonadales.f__Sphingomonadaceae	3.01435			-
k__Bacteria.p__Proteobacteria.c__Alphaproteobacteria.o__Micropepsales.f__Micropepsaceae	2.21371			-
k__Bacteria.p__Proteobacteria.c__Gammaproteobacteria.o__Steroidobacterales	1.41732			-
k__Bacteria.p__Proteobacteria.c__Alphaproteobacteria.o__Rhizobiales.f__KF_JG30_B3.g__KF_JG30_B3	1.43774			-
k__Bacteria.p__Firmicutes.c__Bacilli.Other.Other.Other	1.95142			6.92e-05
k__Bacteria.p__Firmicutes.c__Bacilli.o__Lactobacillales.f__Enterococcaceae.g__Enterococcus	2.14748			-
k__Bacteria.p__Campilobacterota.c__Campylobacteria.o__Campylobacterales	4.91918	Control	4.55202	0.00693383
k__Bacteria.p__Proteobacteria.c__Alphaproteobacteria.o__Caulobacterales	2.10638			-
k__Bacteria.p__Proteobacteria.c__Gammaproteobacteria.o__EPR3968_O8a_Bc78.f__EPR3968_O8a_Bc78.g__EPR3968_O8a_Bc78	0.995133			-
k__Bacteria.p__Actinobacteriota.c__Actinobacteria.o__Micrococcales.f__Micrococcaceae	1.65451			-
k__Bacteria.p__Bacteroidota.c__Bacteroidia.o__Chitinophagales	2.38182			-
k__Bacteria.Other.Other.Other.Other	3.54351			0.010607
k__Bacteria.p__Fibrobacterota	0.213837			-
k__Bacteria.p__Firmicutes.c__Clostridia.o__Eubacteriales.f__Anaerofustaceae.g__Anaerofustis	1.95805			0.000919321
k__Bacteria.p__Acidobacteriota.c__Acidobacteriae.o__Acidobacteriales.f__Acidobacteriales	1.51581			-
k__Bacteria.p__Chloroflexi.c__Ktedonobacteria.o__C0119.f__C0119.g__C0119	0.875259			-
k__Bacteria.p__Bacteroidota.c__Bacteroidia.o__Cytophagales.f__Spirosomaceae.g__Emticicia	1.05844			-
k__Bacteria.p__Firmicutes.c__Bacilli.o__Lactobacillales.f__Aerococcaceae	0.468706			-
k__Bacteria.p__Proteobacteria.c__Alphaproteobacteria.o__Sphingomonadales.f__Sphingomonadaceae.g__Altererythrobacter	1.3304			-
k__Bacteria.p__RCP2_54.c__RCP2_54.o__RCP2_54.f__RCP2_54	1.9273			-
k__Bacteria.p__Cyanobacteria.c__Cyanobacteriia.Other	0.685198			-
k__Bacteria.p__Firmicutes.Other.Other	2.89163			2.96e-05
k__Bacteria.p__Firmicutes.c__Clostridia.o__Christensenellales.f__Christensenellaceae.g__Christensenellaceae_R_7_group	2.20027			0.000446024
k__Bacteria.p__Acidobacteriota.c__Acidobacteriae.o__GOUTB8	1.35385			0.00672013
k__Bacteria.p__Actinobacteriota.c__Actinobacteria.o__Frankiales.f__Frankiaceae.g__Jatrophihabitans	1.54182			0.00595706
k__Bacteria.p__Desulfobacterota.c__Syntrophobacteria.o__Syntrophobacterales.f__Syntrophobacteraceae	1.25482			0.0334083
k__Bacteria.p__Acidobacteriota.c__Acidobacteriae.o__Subgroup_2.f__Subgroup_2.g__Subgroup_2	2.15566			0.0186963
