# Supplementary material for: Effects of hemoglobin extracted from Tegillarca granosa on the gut microbiota in iron deficiency anemia mice
Source: Royal Society of Chemistry journal article supplement (doi:10.1039/d3fo00695f), 2023-01-01
Supplement: d3fo00695f2.pdf [file d3fo00695f2.pdf]

### Supplementary material

Table S1. Effect of iron supplements on body weight gain, Hb iron and iron intake of mice.

| Group              | Body weight gain (g)      | HbFei (mg)               | HbFef (mg)               | Mean feed intake (g)      | Mean hemoglobin intake (mg)  | Total iron intake (mg)    |
|--------------------|---------------------------|--------------------------|--------------------------|---------------------------|------------------------------|---------------------------|
| Control group      | 8.97 ± 1.91 <sup>a</sup>  | 0.95 ± 0.04 <sup>a</sup> | 1.26 ± 0.10 <sup>a</sup> | 73.75 ± 9.33 <sup>a</sup> | -                            | 13.40 ± 1.70 <sup>a</sup> |
|                    | 4.47 ± 1.84 <sup>c</sup>  | 0.43 ± 0.13 <sup>b</sup> | 0.51 ± 0.12 <sup>e</sup> | 46.13 ± 3.83 <sup>c</sup> | -                            | 0.41 ± 0.03 <sup>c</sup>  |
| Anemia model group | 6.08 ± 1.21 <sup>bc</sup> | 0.42 ± 0.06 <sup>b</sup> | 0.78 ± 0.03 <sup>d</sup> | 60.38 ± 3.42 <sup>b</sup> | 97.50 ± 9.44 <sup>b</sup>    | 0.73 ± 0.04 <sup>c</sup>  |
|                    | 7.28 ± 2.16 <sup>ab</sup> | 0.40 ± 0.07 <sup>b</sup> | 1.06 ± 0.07 <sup>b</sup> | 63.50 ± 3.74 <sup>b</sup> | 1020.63 ± 13.85 <sup>a</sup> | 2.50 ± 0.04 <sup>b</sup>  |
| Low dose group     | 5.75 ± 1.97 <sup>bc</sup> | 0.37 ± 0.09 <sup>b</sup> | 0.92 ± 0.10 <sup>c</sup> | 62.38 ± 2.72 <sup>b</sup> | -                            | 2.68 ± 0.36 <sup>b</sup>  |
|                    |                           |                          |                          |                           |                              |                           |

Notes: HbFei and HbFef represent the Hb iron before and after iron supplementation period. Different letters within the same column indicate significant difference at the different groups ( $p < 0.05$ ).
